# Supplementary material for: Organopnictogen(iii) bis(arylthiolates) containing NCN-aryl pincer ligands: from synthesis and characterization to reactivity
Source: Royal Society of Chemistry journal article supplement (doi:10.1039/d2dt01436j), 2022-01-01
Supplement: d2dt01436j1.pdf [file d2dt01436j1.pdf]

## Electronic Supporting Information

### **Organopnictogen(III) bis(arylthiolates) containing *NCN*-aryl pincer ligands: from synthesis and characterization to reactivity**

Gabriel Duneş, Albert Soran, and Cristian Silvestru

Supramolecular Organic and Organometallic Chemistry Centre, Department of Chemistry, Faculty of Chemistry and Chemical Engineering, Babeş-Bolyai University, 11 Arany Janos, 400028 Cluj-Napoca, Romania.

Fax: (+40) 264-590818, Tel: (+40) 264-593833; E-mail: [cristian.silvestru@ubbcluj.ro](mailto:cristian.silvestru@ubbcluj.ro)

#### Table of Contents

|                                           |     |
|-------------------------------------------|-----|
| Numbering scheme for NMR assignments..... | S2  |
| Representative NMR spectra .....          | S3  |
| Mass spectrometry data .....              | S12 |
| Crystallographic data.....                | S22 |
| References.....                           | S27 |

## Numbering scheme for NMR assignments

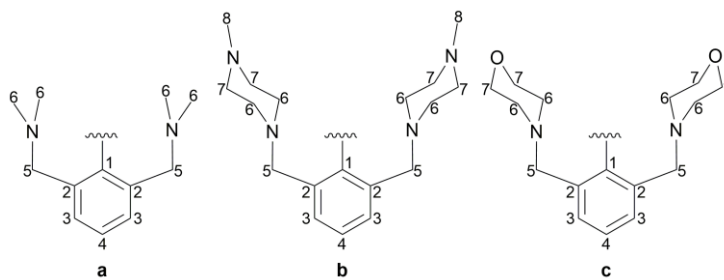

**Scheme 1.** Numbering scheme of the pincer ligands used in NMR assignments (**a** for compounds **7** and **8**; **b** for compounds **9** and **10**; **c** for compounds **5**, **6**, **11**, **12** and **17**).

## Representative NMR spectra

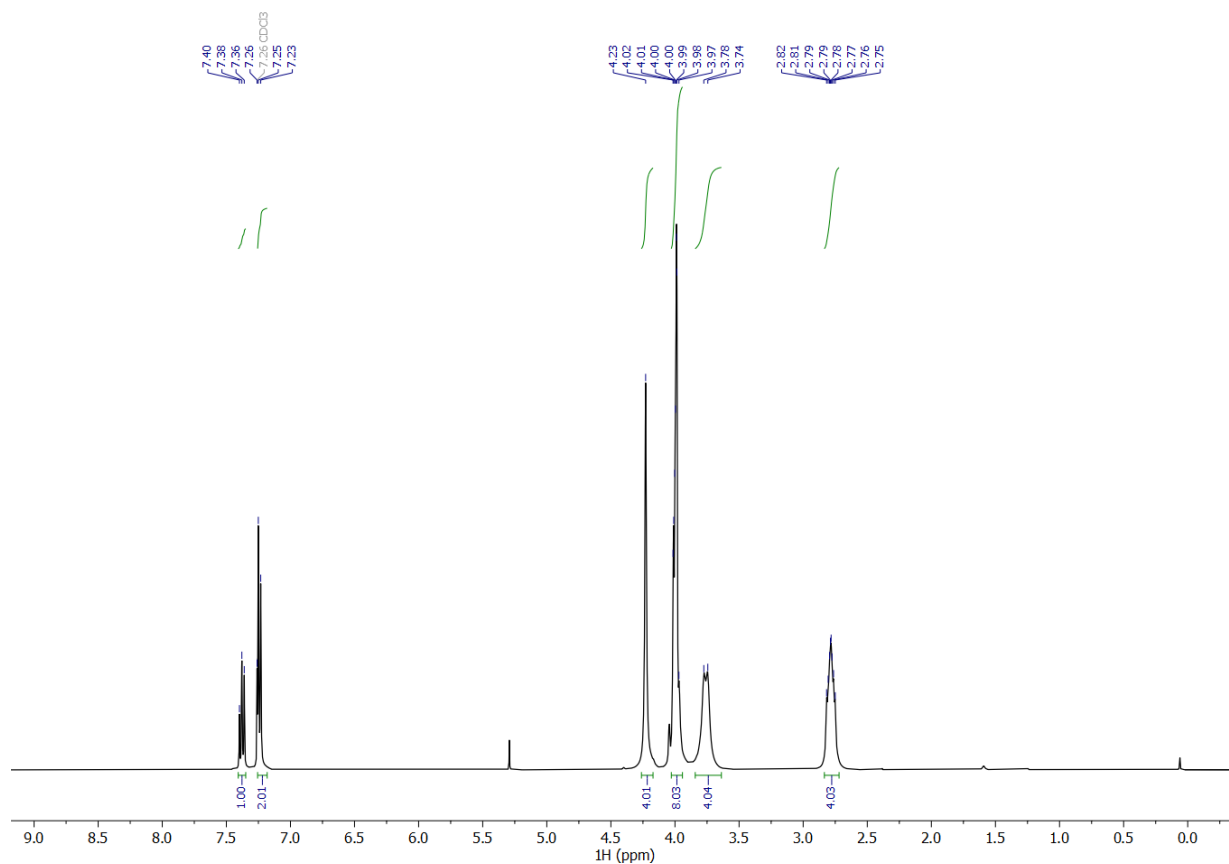

Figure S1.  $^1\text{H}$  NMR spectrum of **5** ( $\text{CDCl}_3$ , 400 MHz) at r.t.

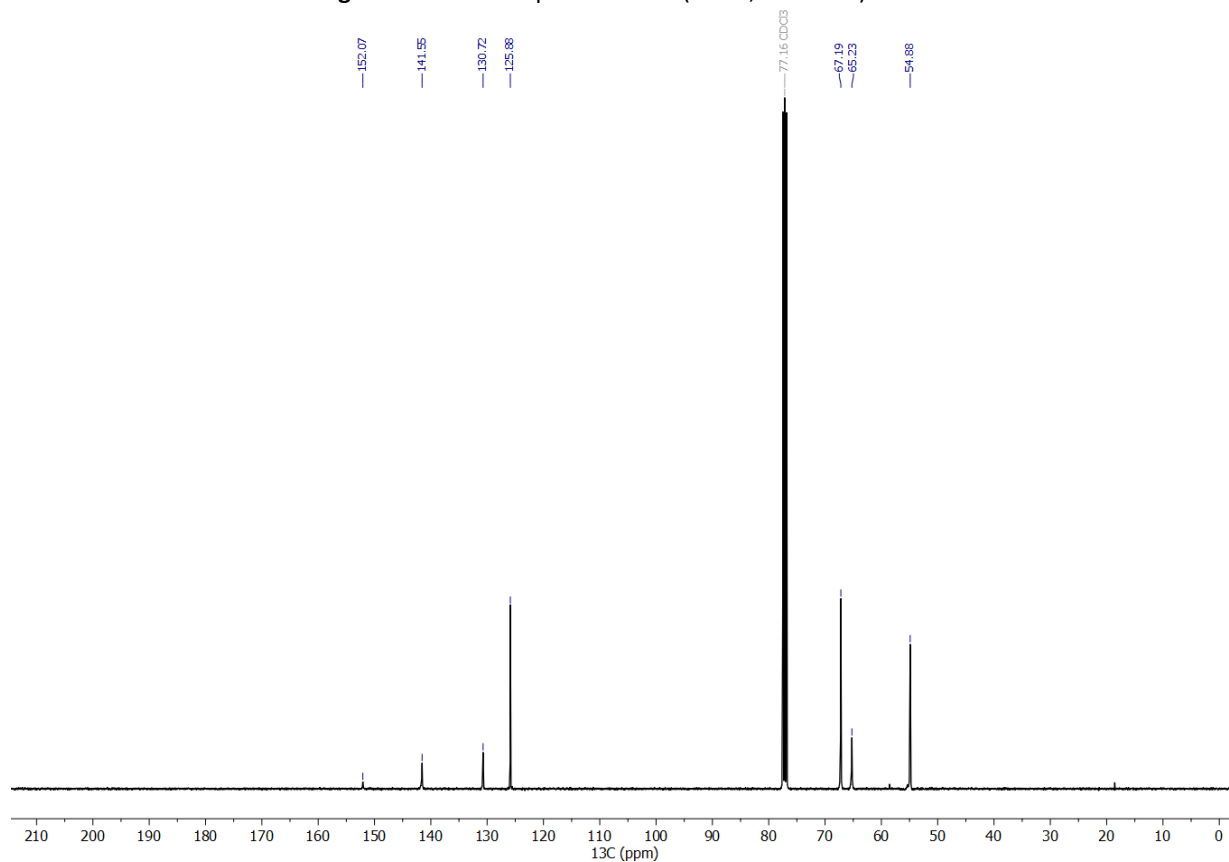

Figure S2.  $^{13}\text{C}\{^1\text{H}\}$  NMR spectrum of **5** ( $\text{CDCl}_3$ , 400 MHz) at r.t.

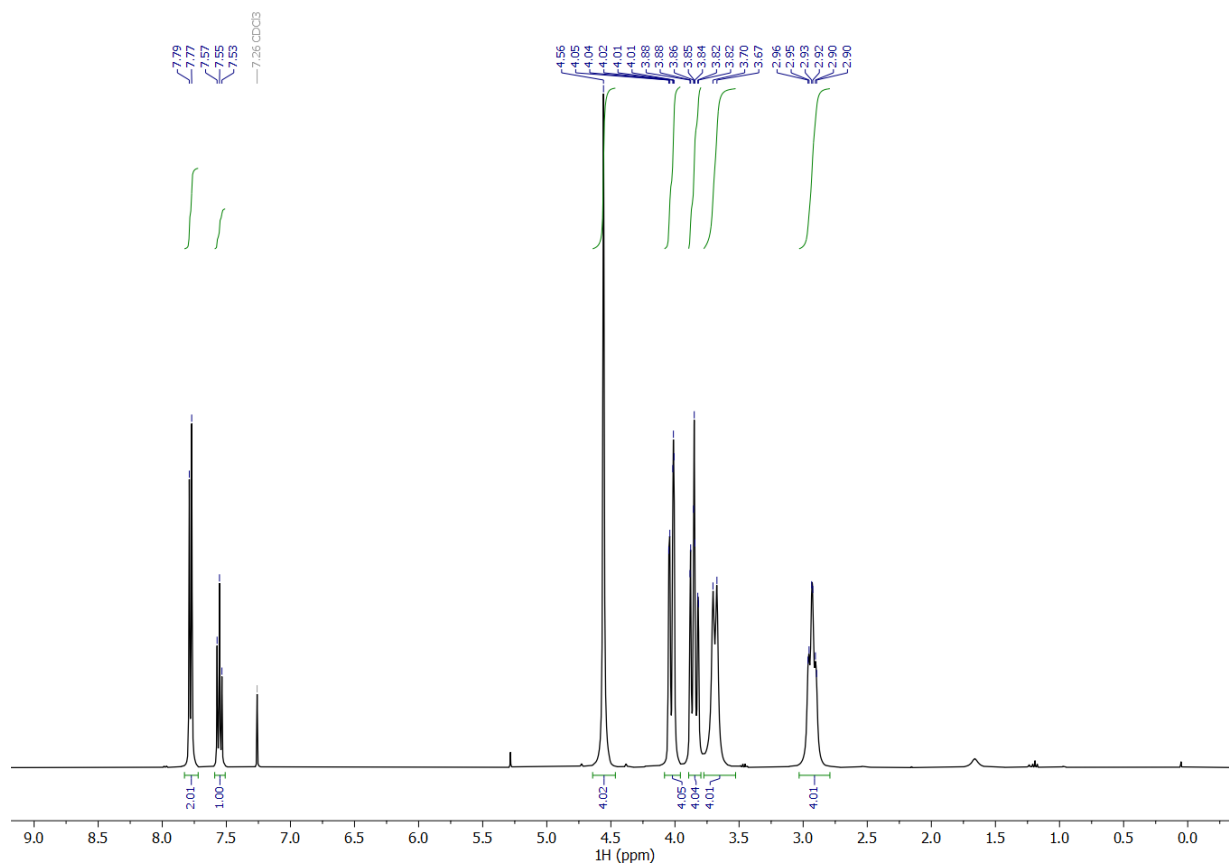

Figure S3.  $^1\text{H}$  NMR spectrum of **6** ( $\text{CDCl}_3$ , 400 MHz) at r.t.

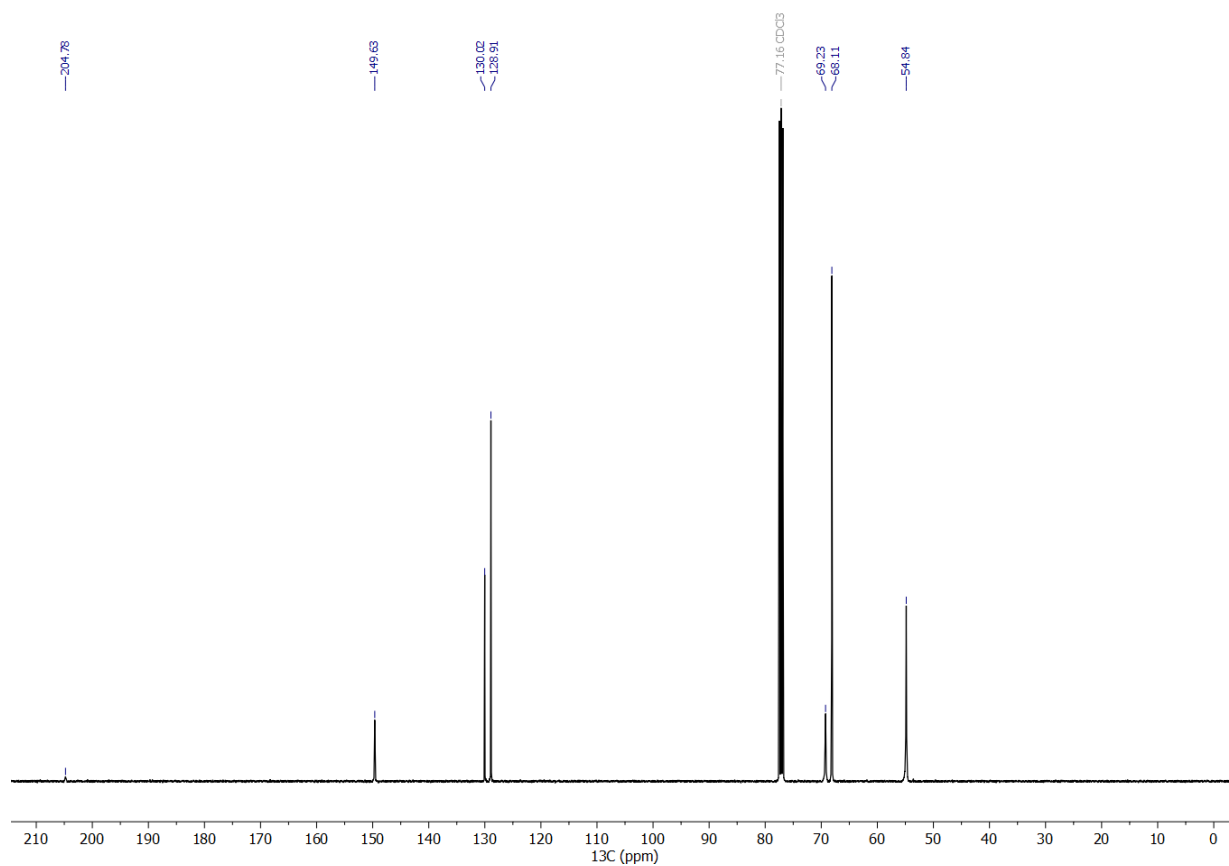

Figure S4.  $^{13}\text{C}\{^1\text{H}\}$  NMR spectrum of **6** ( $\text{CDCl}_3$ , 400 MHz) at r.t.

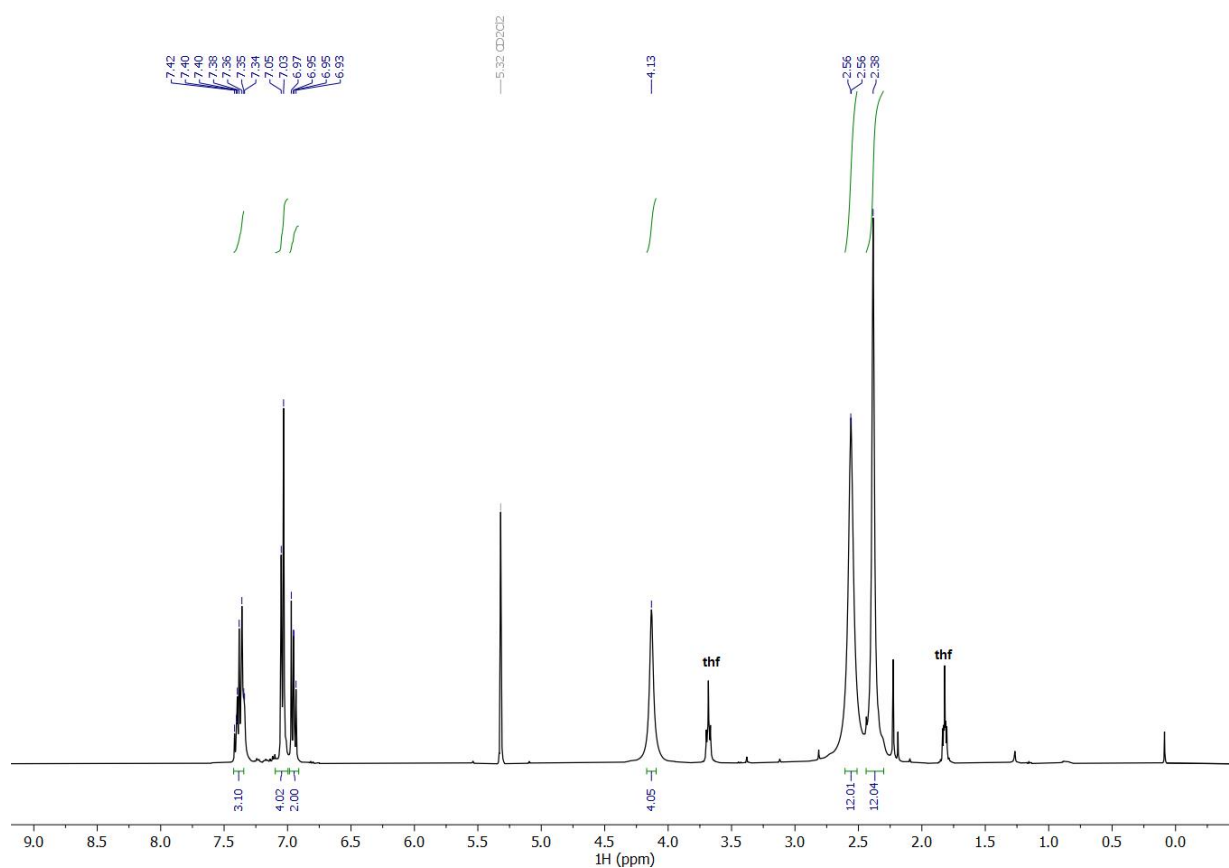

Figure S5. <sup>1</sup>H NMR spectrum of **7** (CD<sub>2</sub>Cl<sub>2</sub>, 400 MHz) at r.t.

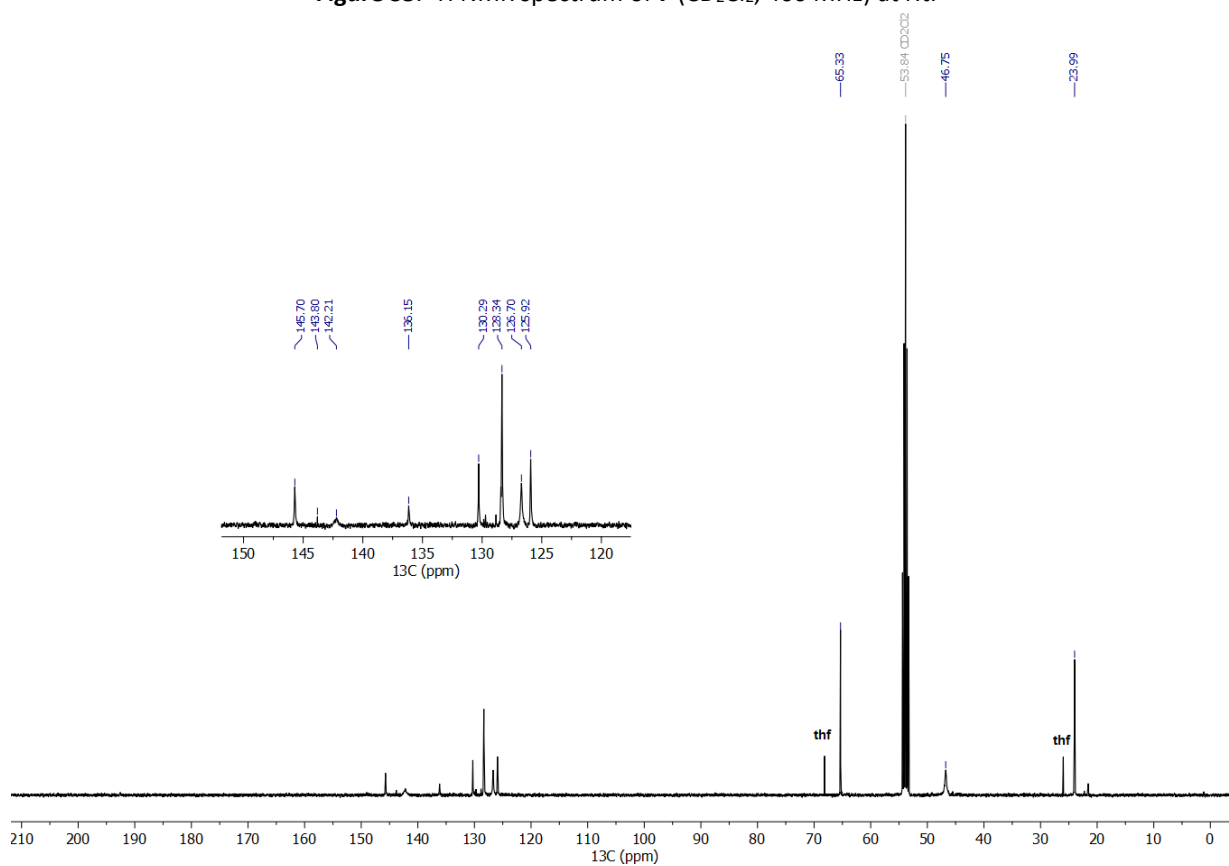

Figure S6. <sup>13</sup>C{<sup>1</sup>H} NMR spectrum of **7** (CD<sub>2</sub>Cl<sub>2</sub>, 101 MHz) at r.t.

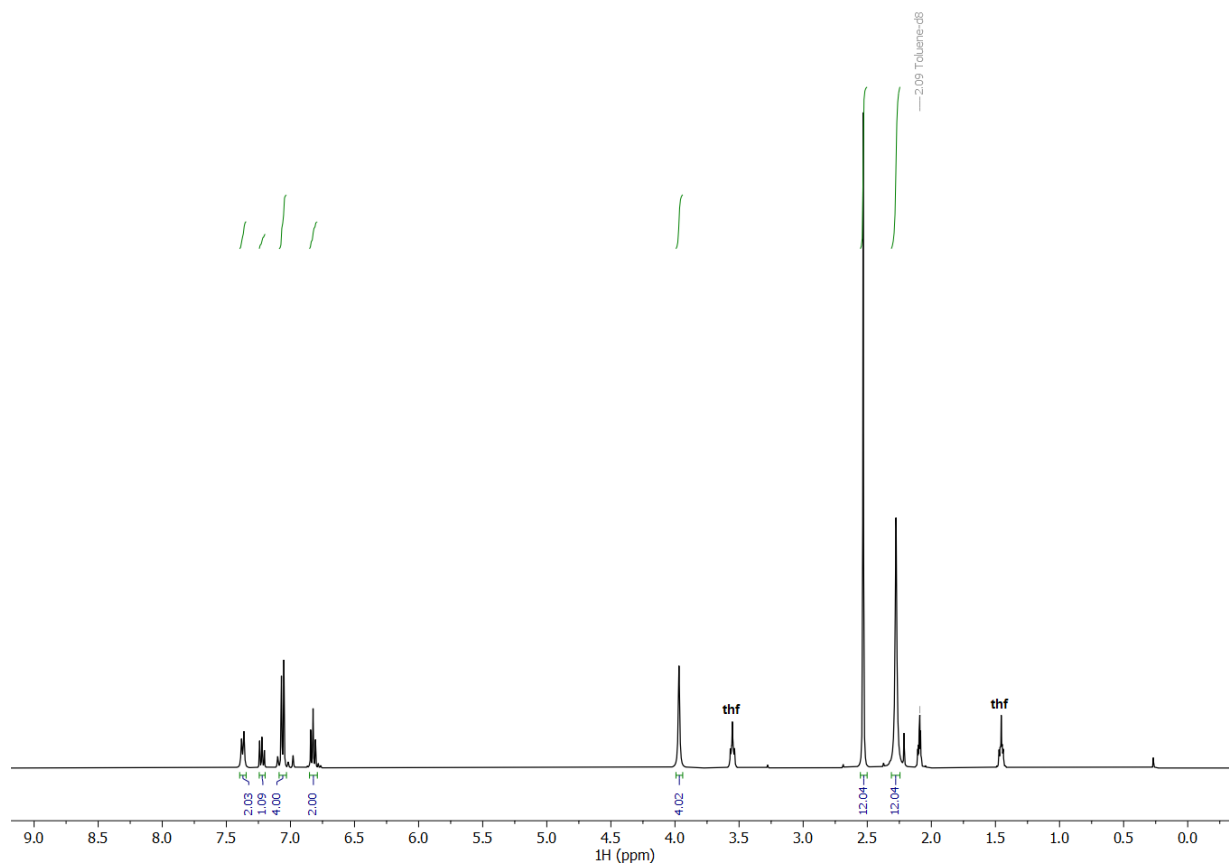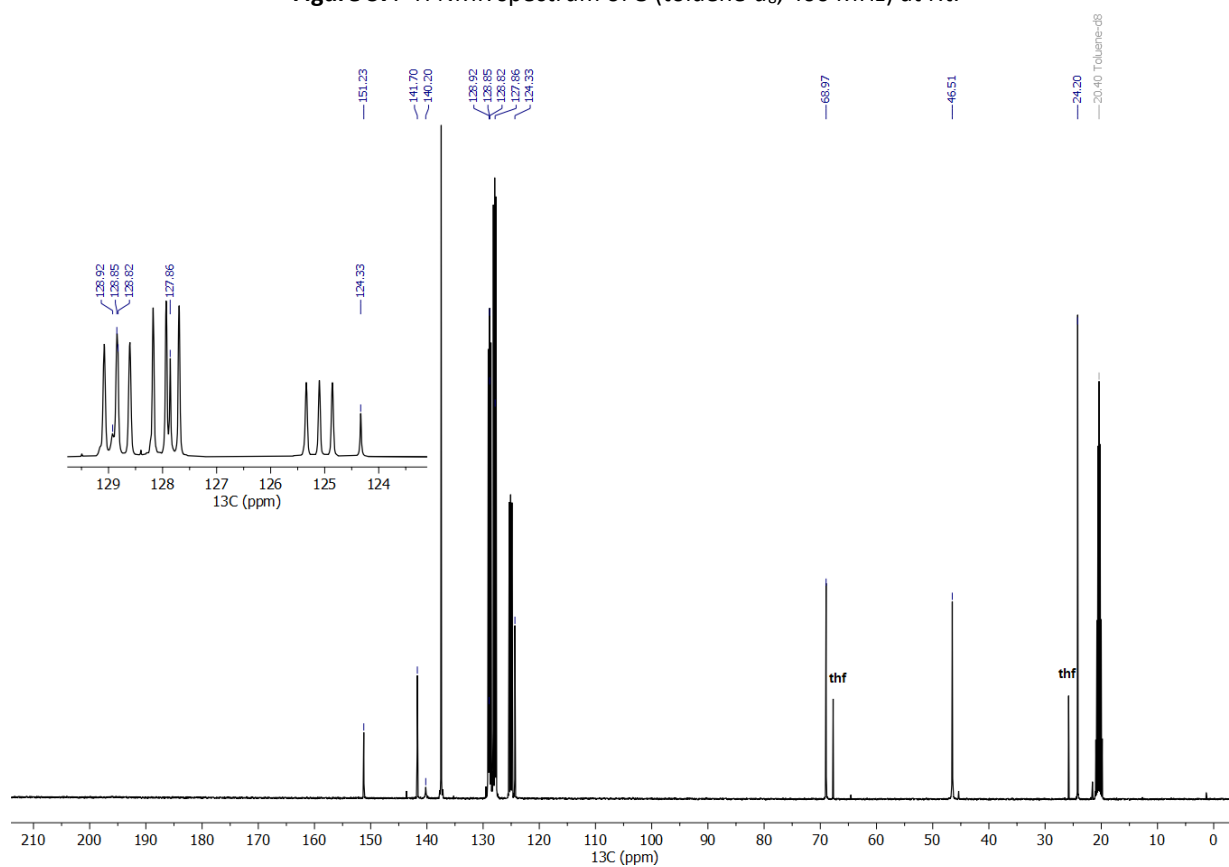

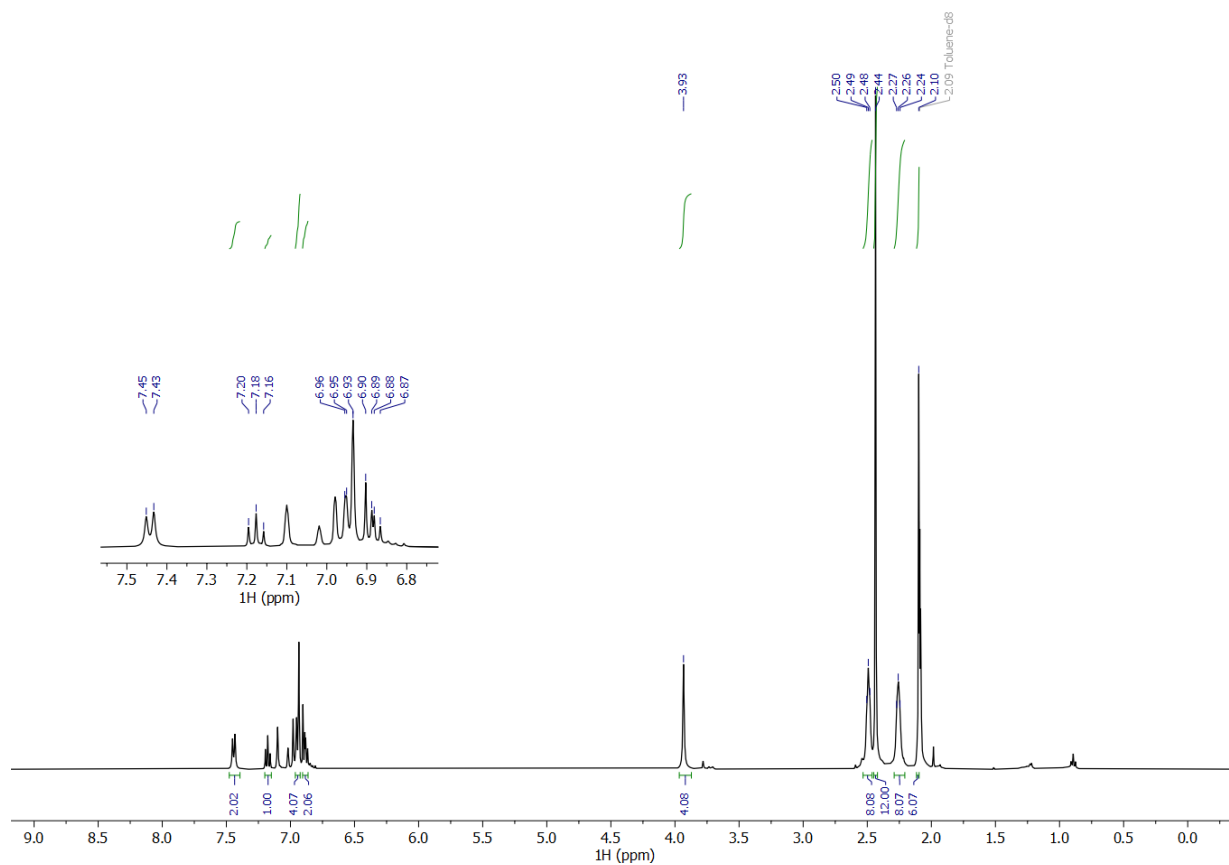

Figure S9.  $^1\text{H}$  NMR spectrum of **9** (toluene- $d_8$ , 400 MHz) at r.t.

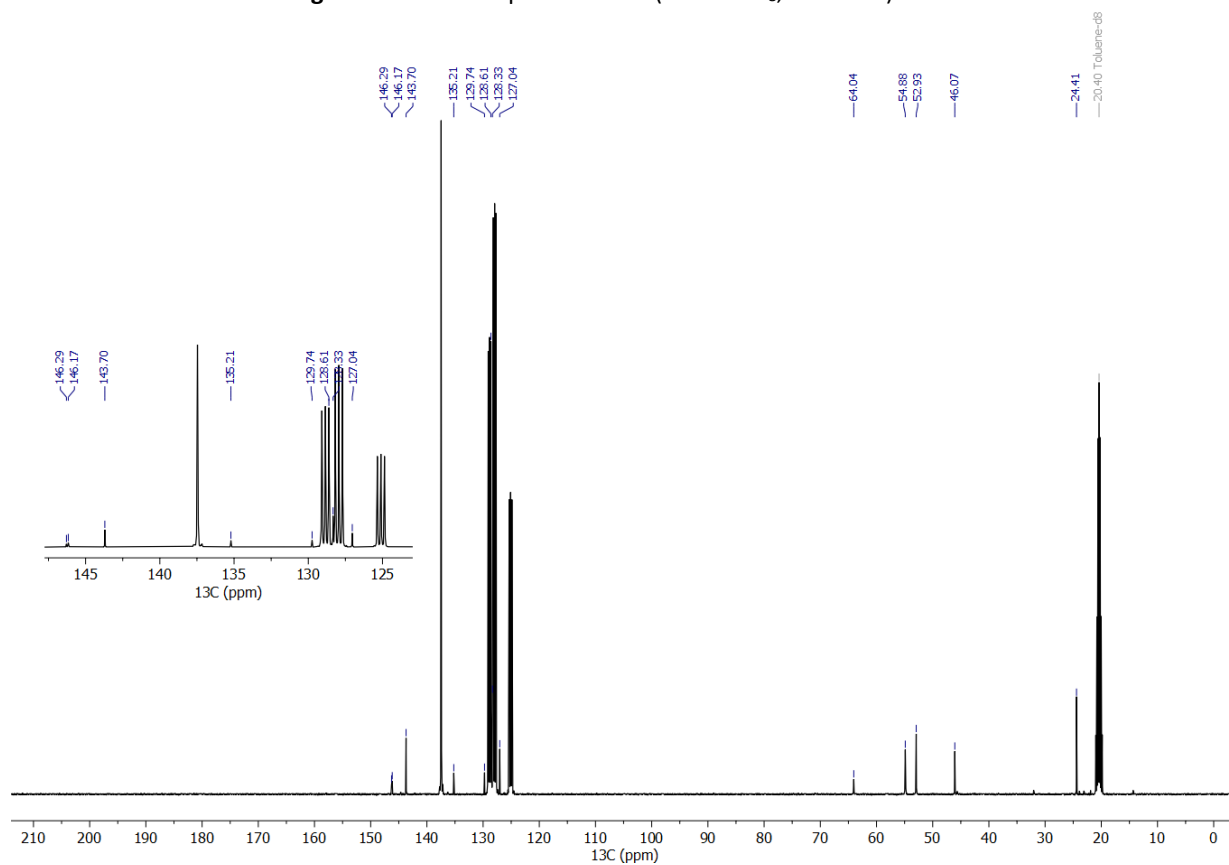

Figure S10.  $^{13}\text{C}\{^1\text{H}\}$  NMR spectrum of **9** (toluene- $d_8$ , 101 MHz) at r.t.

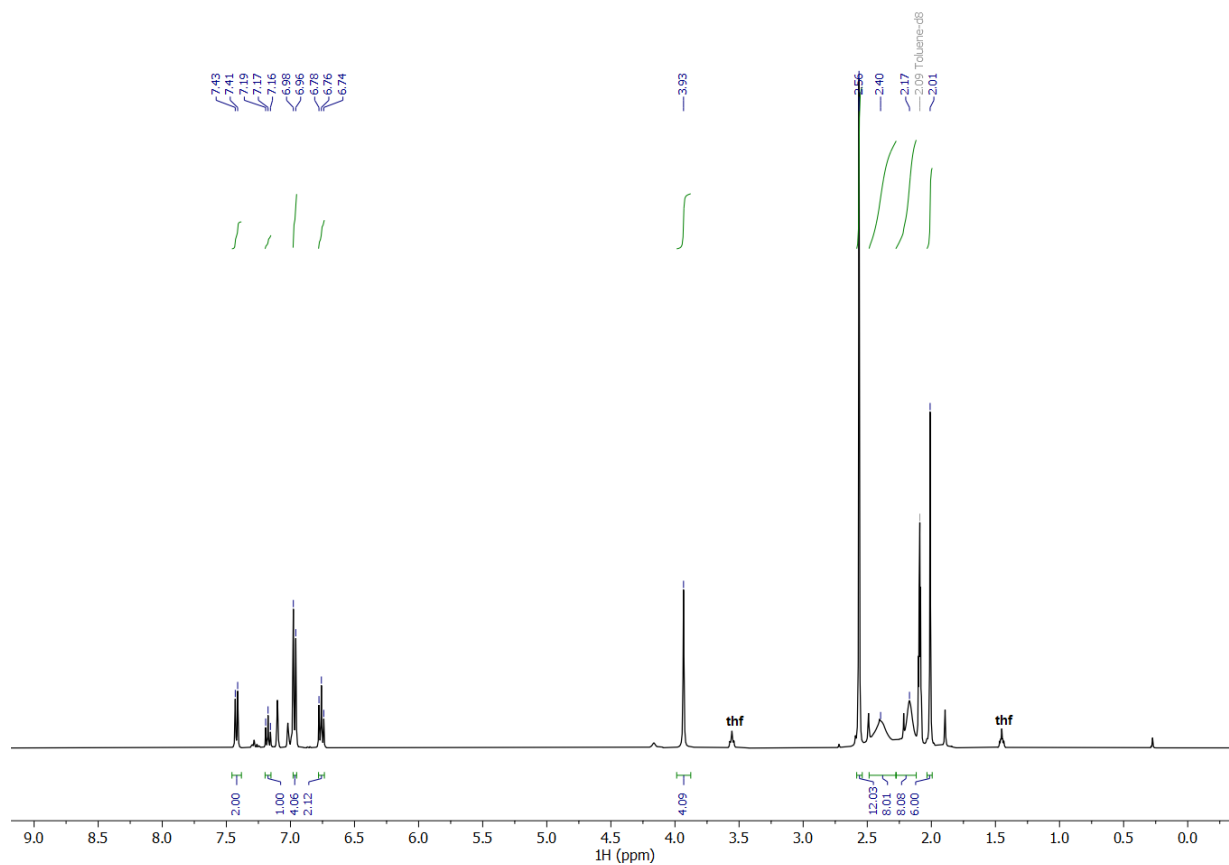

Figure S11.  $^1\text{H}$  NMR spectrum of **10** (toluene- $d_8$ , 400 MHz) at r.t.

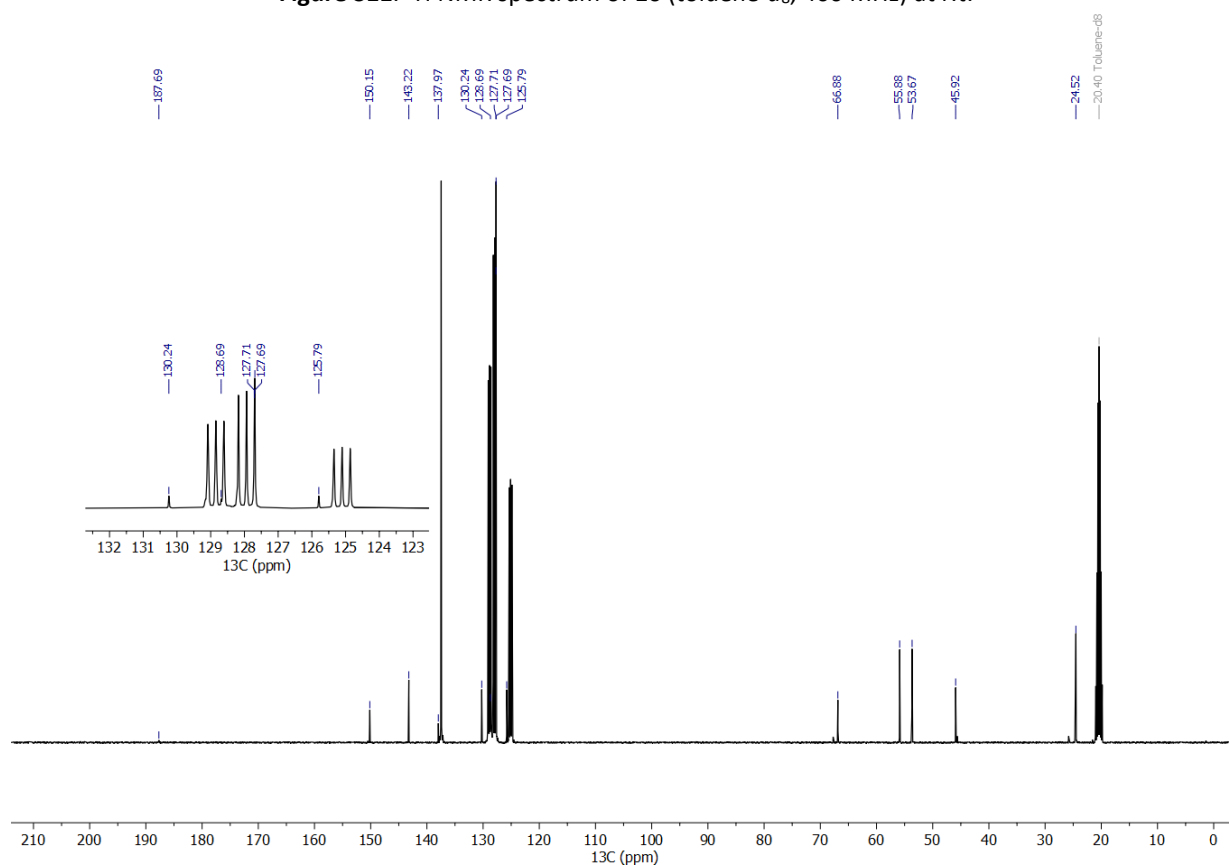

Figure S12.  $^{13}\text{C}\{^1\text{H}\}$  NMR spectrum of **10** (toluene- $d_8$ , 101 MHz) at r.t.



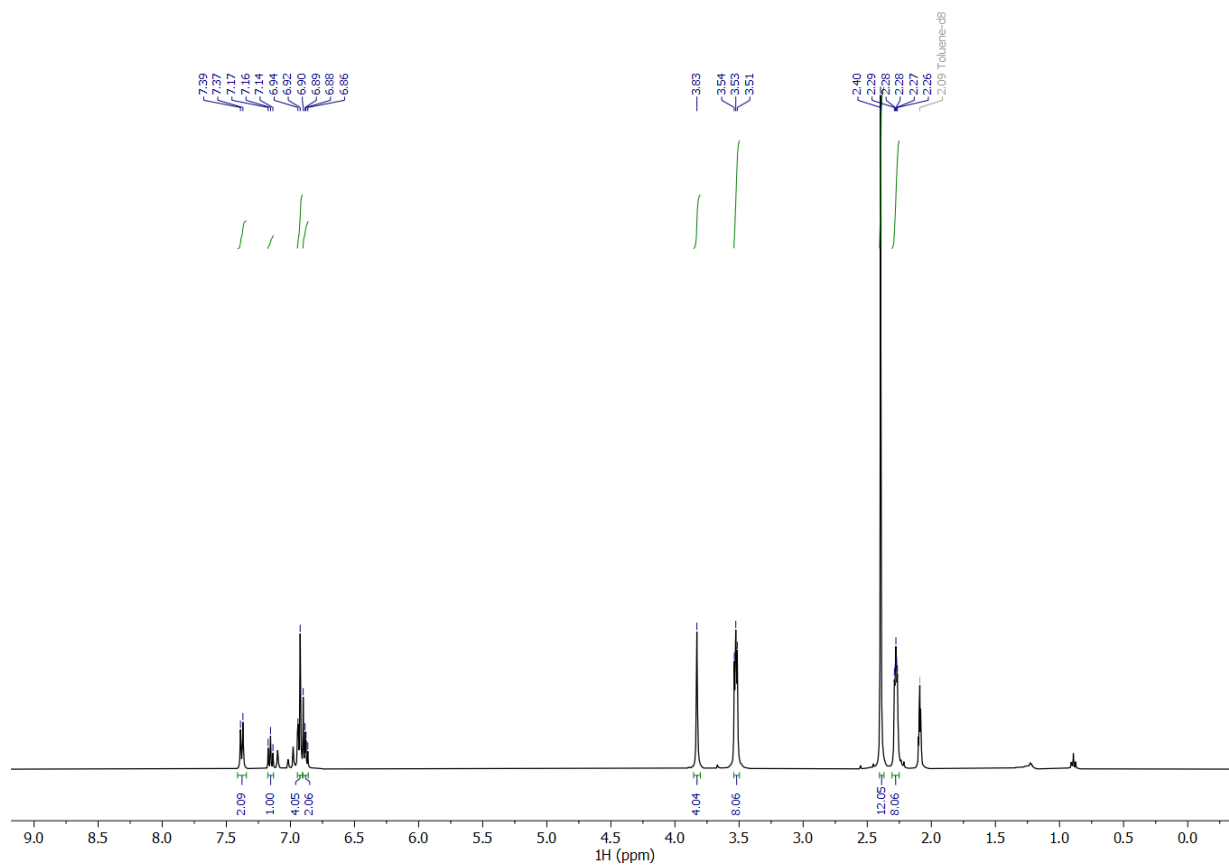

Figure S13.  $^1\text{H}$  NMR spectrum of **11** (toluene- $d_8$ , 400 MHz) at r.t.

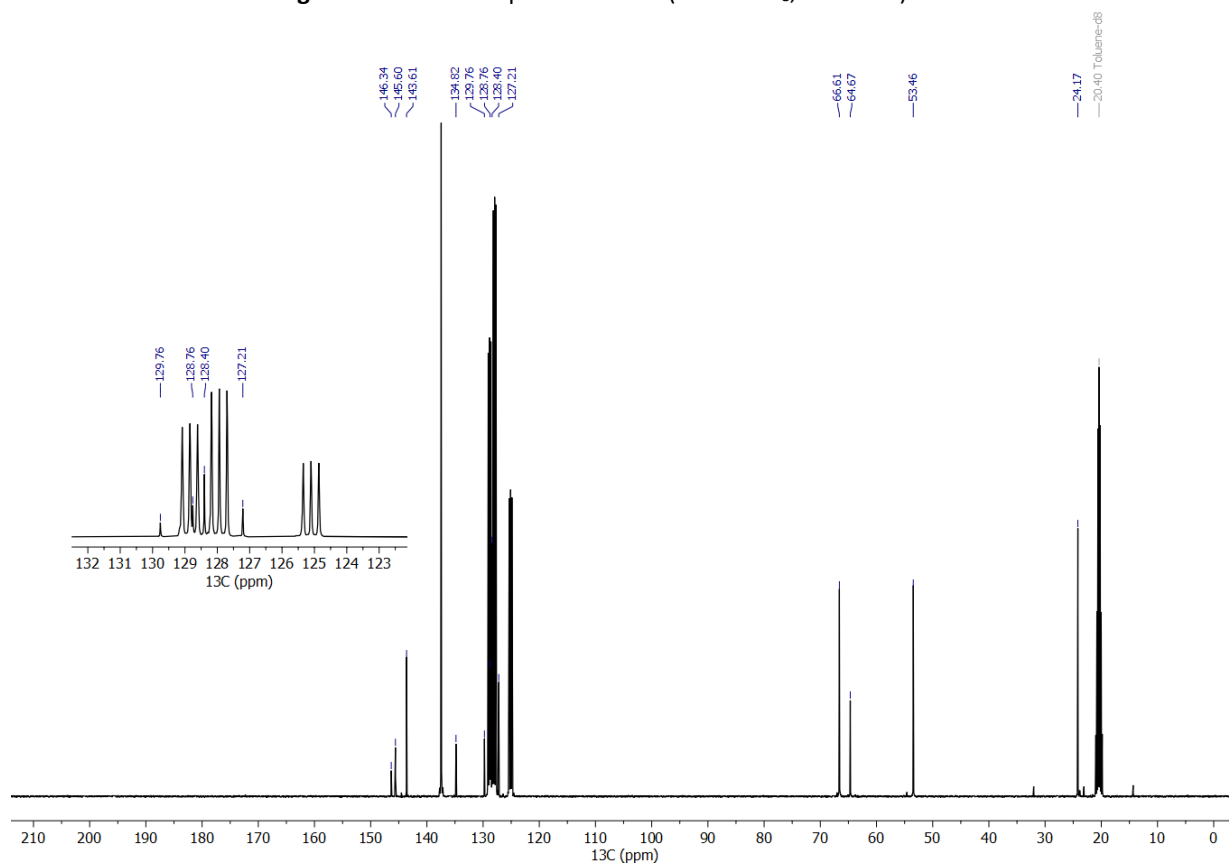

Figure S14.  $^{13}\text{C}\{^1\text{H}\}$  NMR spectrum of **11** (toluene- $d_8$ , 101 MHz) at r.t.

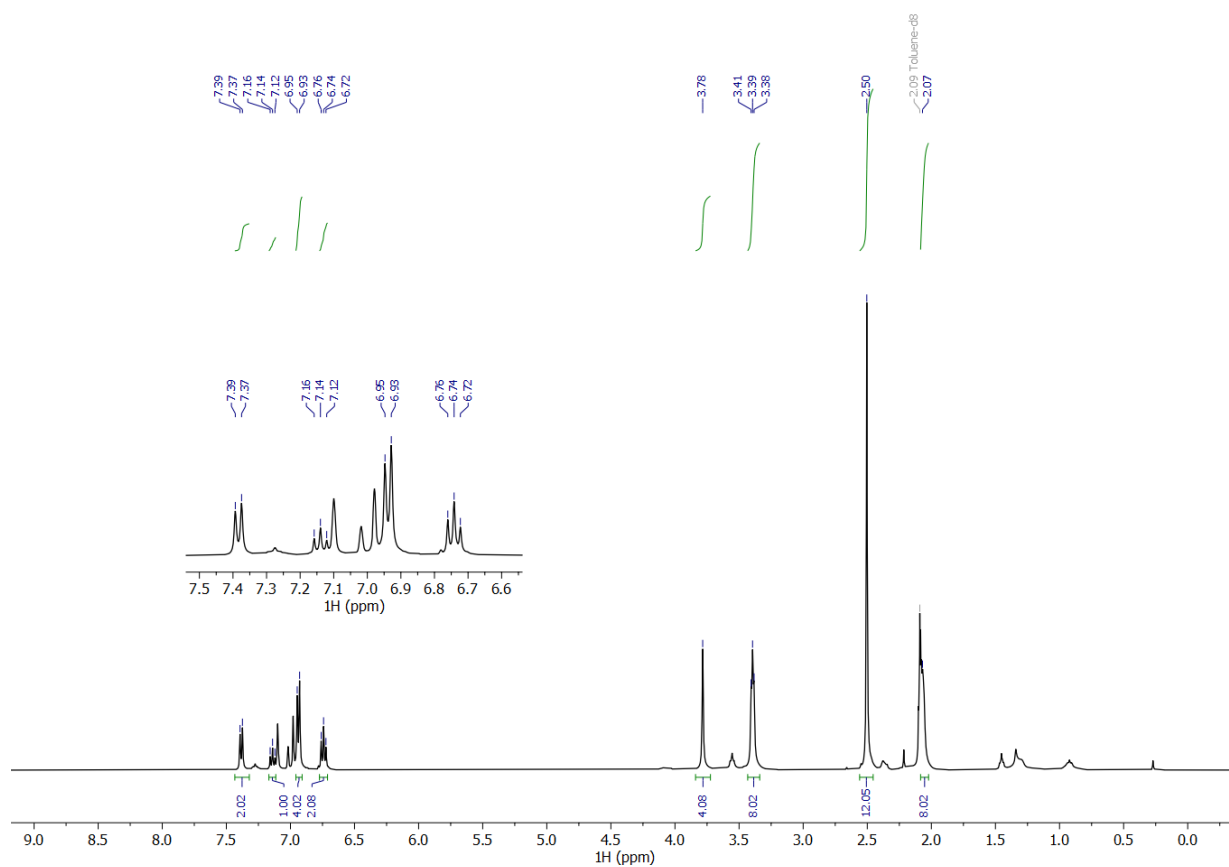

Figure S15.  $^1\text{H}$  NMR spectrum of **12** (toluene- $d_8$ , 400 MHz) at r.t.

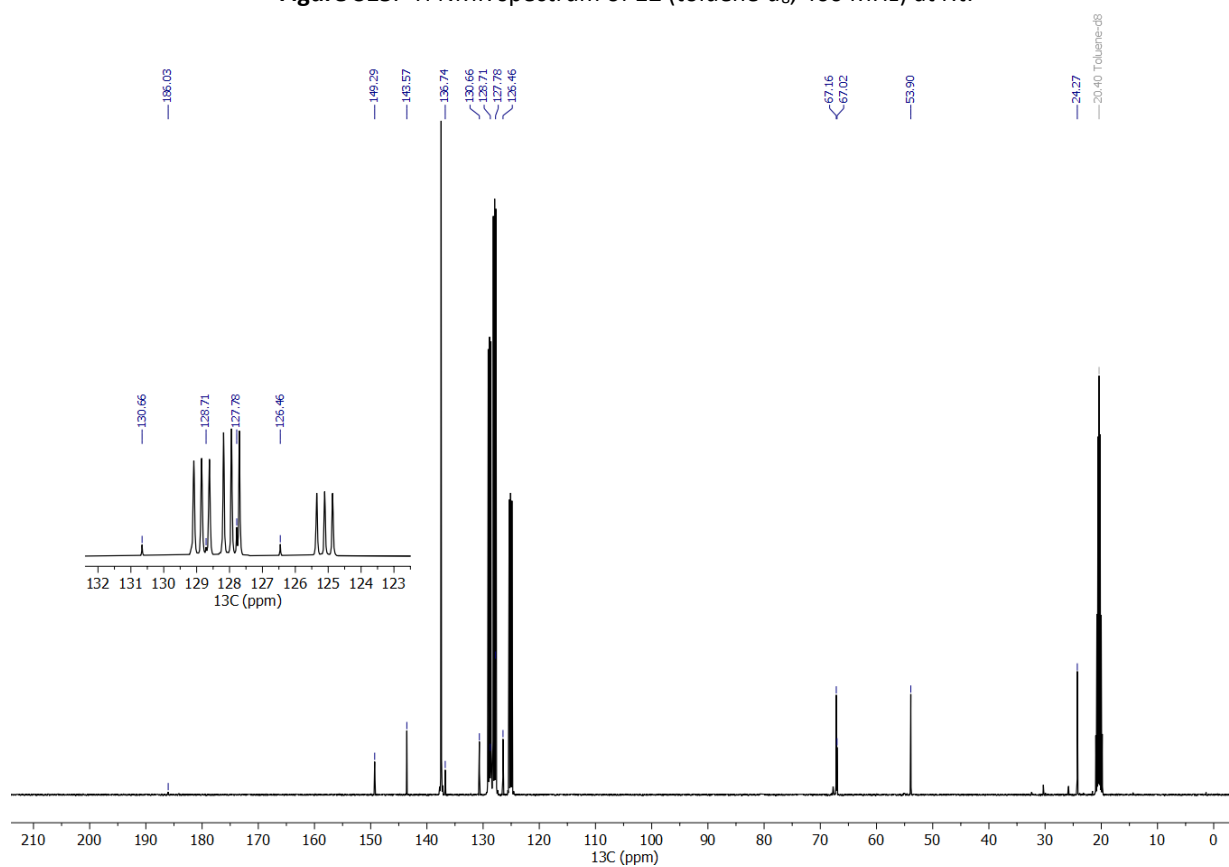

Figure S16.  $^{13}\text{C}\{^1\text{H}\}$  NMR spectrum of **12** (toluene- $d_8$ , 101 MHz) at r.t.

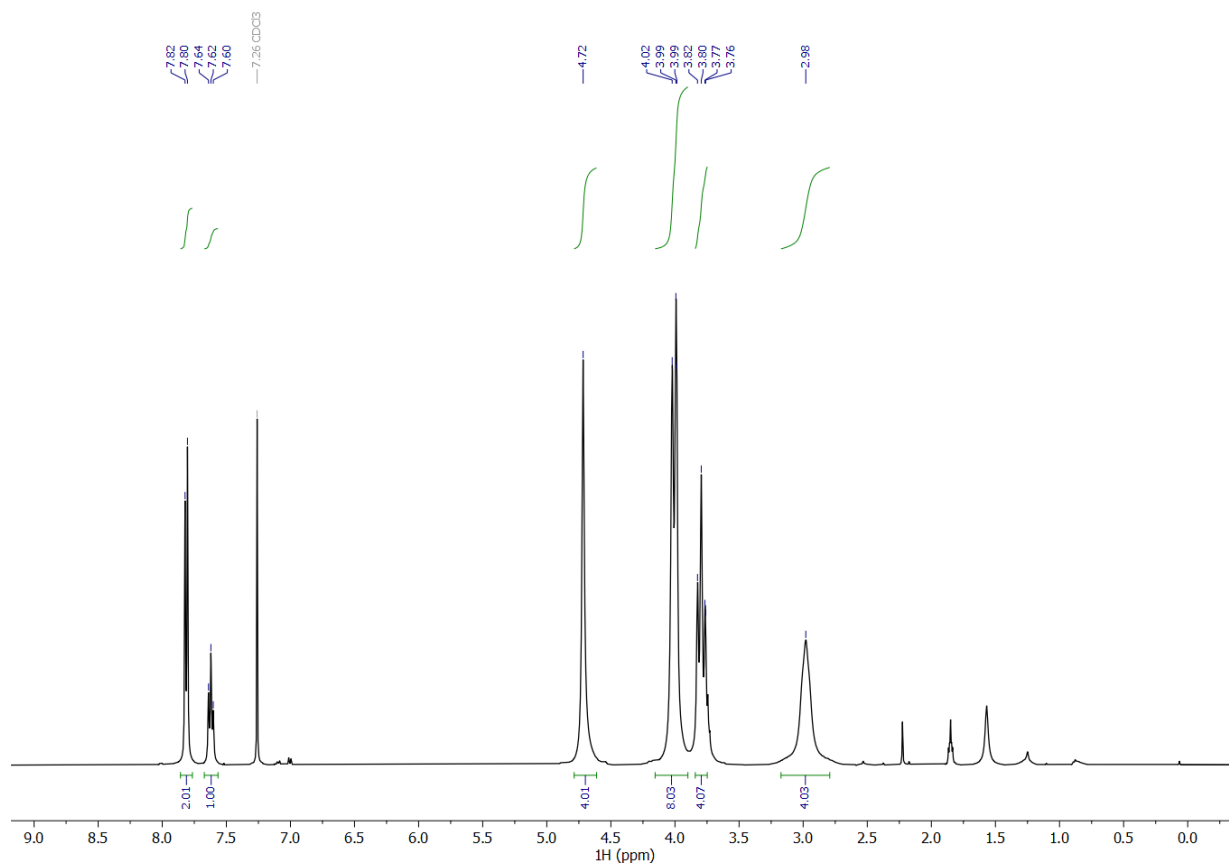

Figure S17.  $^1\text{H}$  NMR spectrum of **17** ( $\text{CDCl}_3$ , 400 MHz) at r.t.

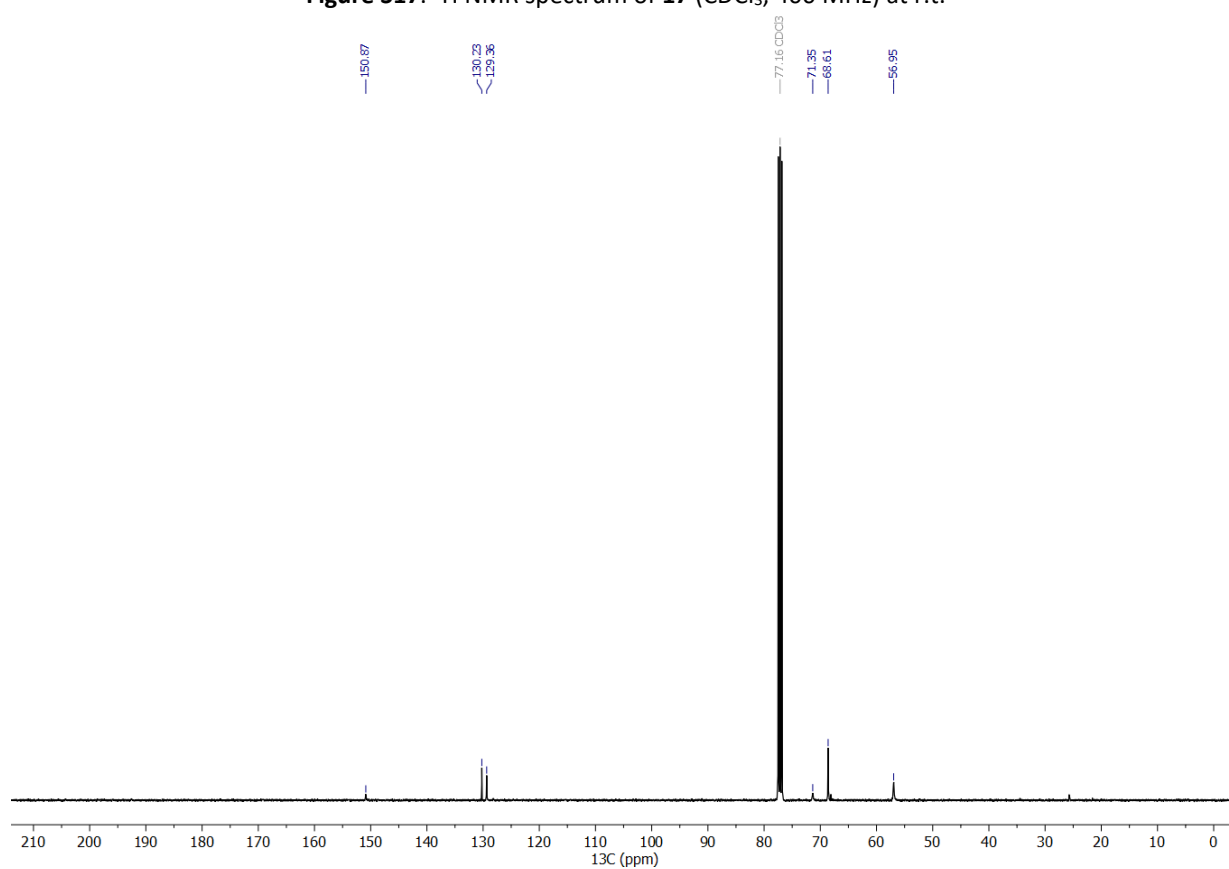

Figure S18.  $^{13}\text{C}\{^1\text{H}\}$  NMR spectrum of **17** ( $\text{CDCl}_3$ , 101 MHz) at r.t.

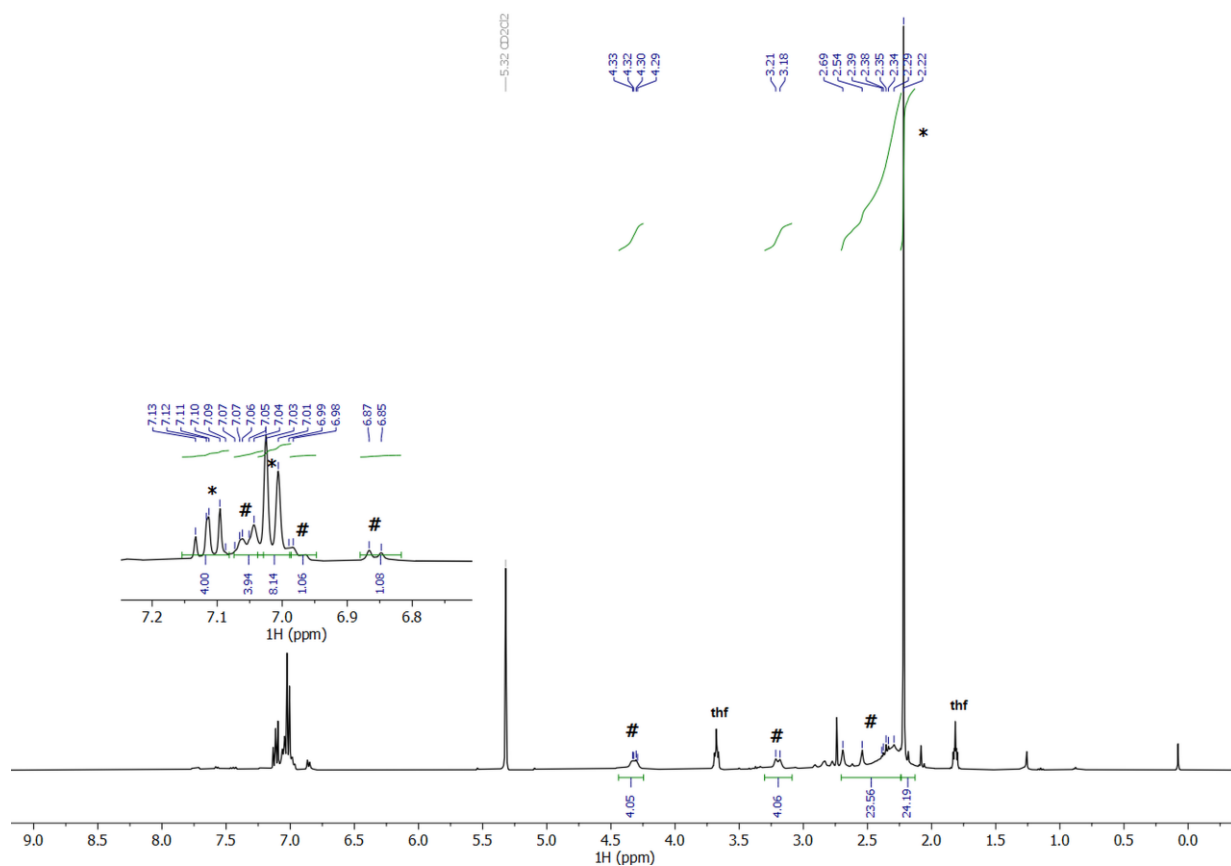

**Figure S19.**  $^1\text{H}$  NMR spectrum ( $\text{CD}_2\text{Cl}_2$ , 400 MHz) at r.t. of the crude products *cyclo*-[2,6-( $\text{Me}_2\text{NCH}_2$ ) $_2\text{C}_6\text{H}_3\text{Bi}(\mu\text{-O})$ ] $_2$  (#) and  $\text{ArSSAr}$  (\*), where  $\text{Ar} = \text{C}_6\text{H}_3\text{Me}_2$ -2,6, generated by reaction of [2,6-( $\text{Me}_2\text{NCH}_2$ ) $_2\text{C}_6\text{H}_3$ Bi(SAr) $_2$  (**8**) with  $\text{O}_2$  after 1 h.

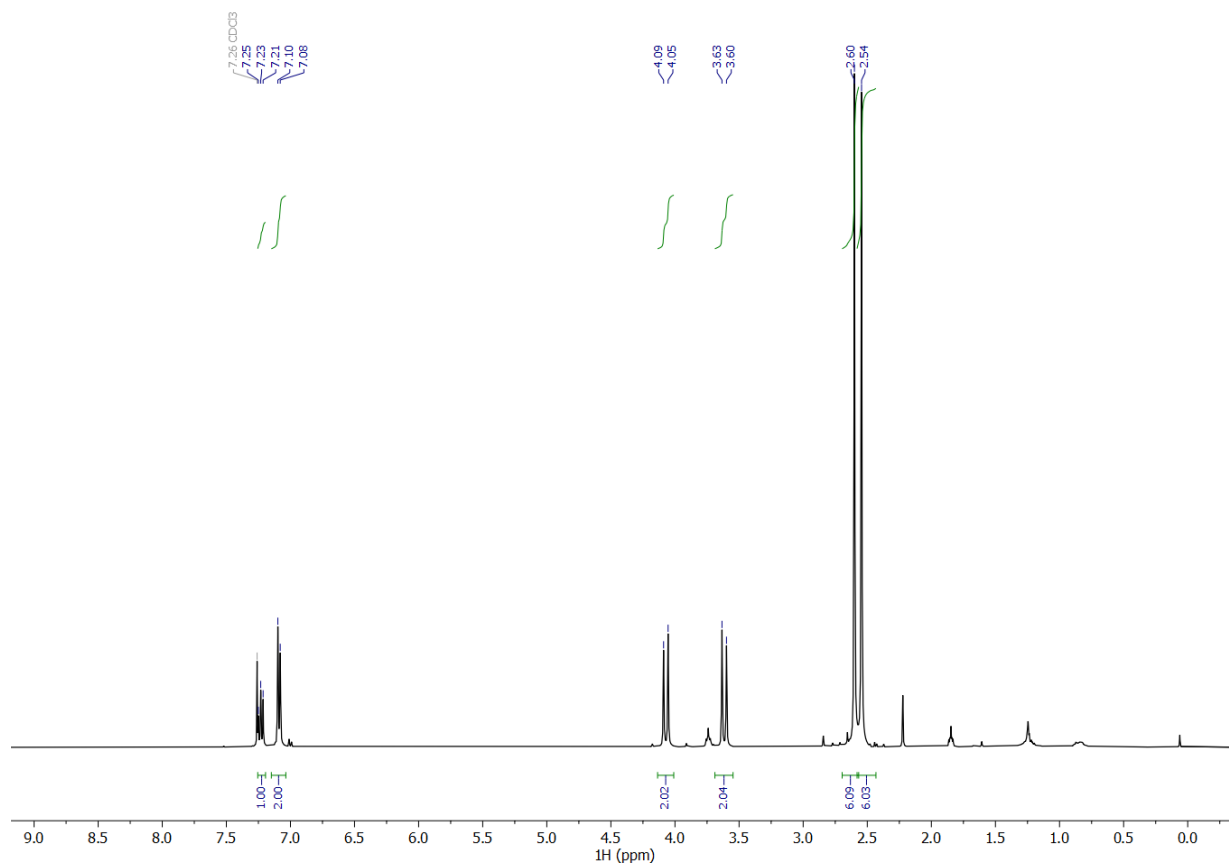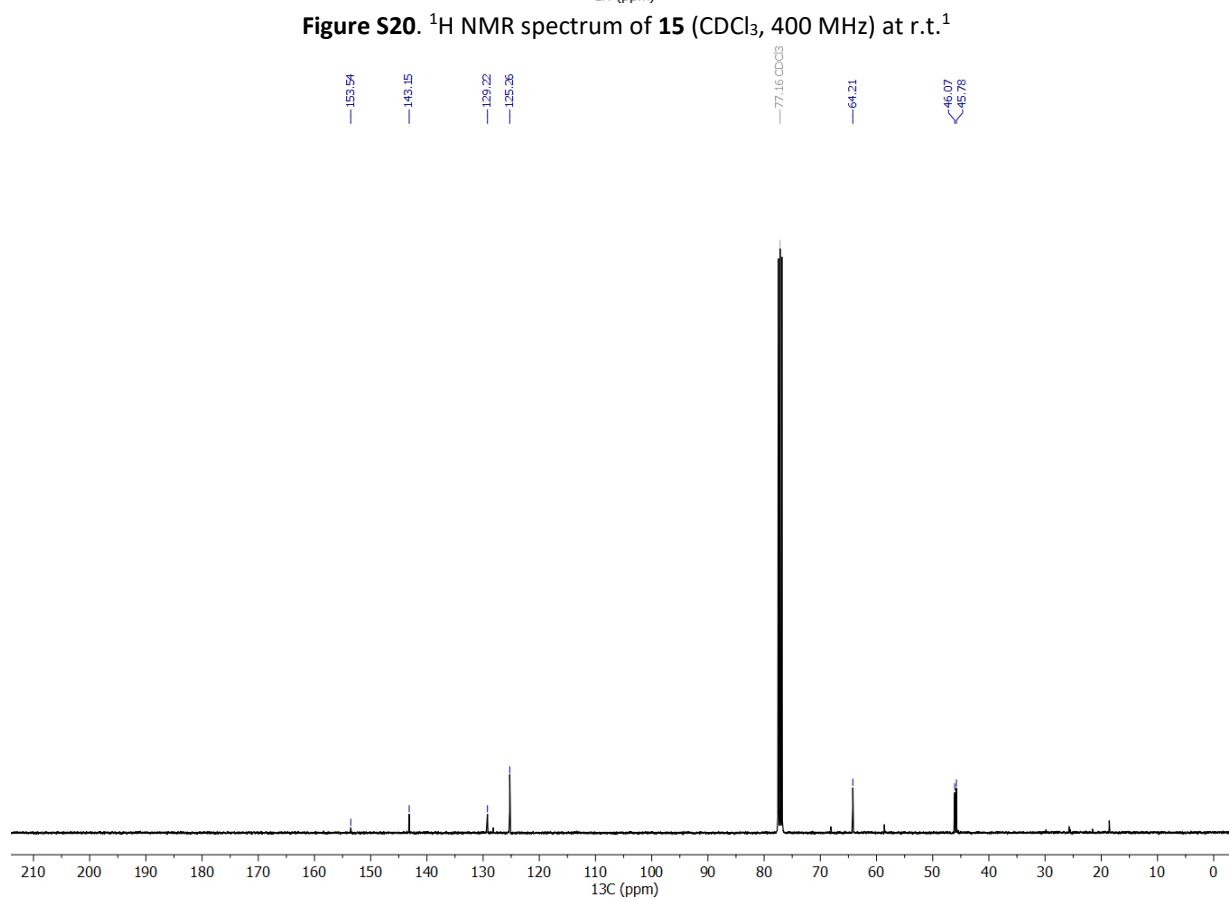

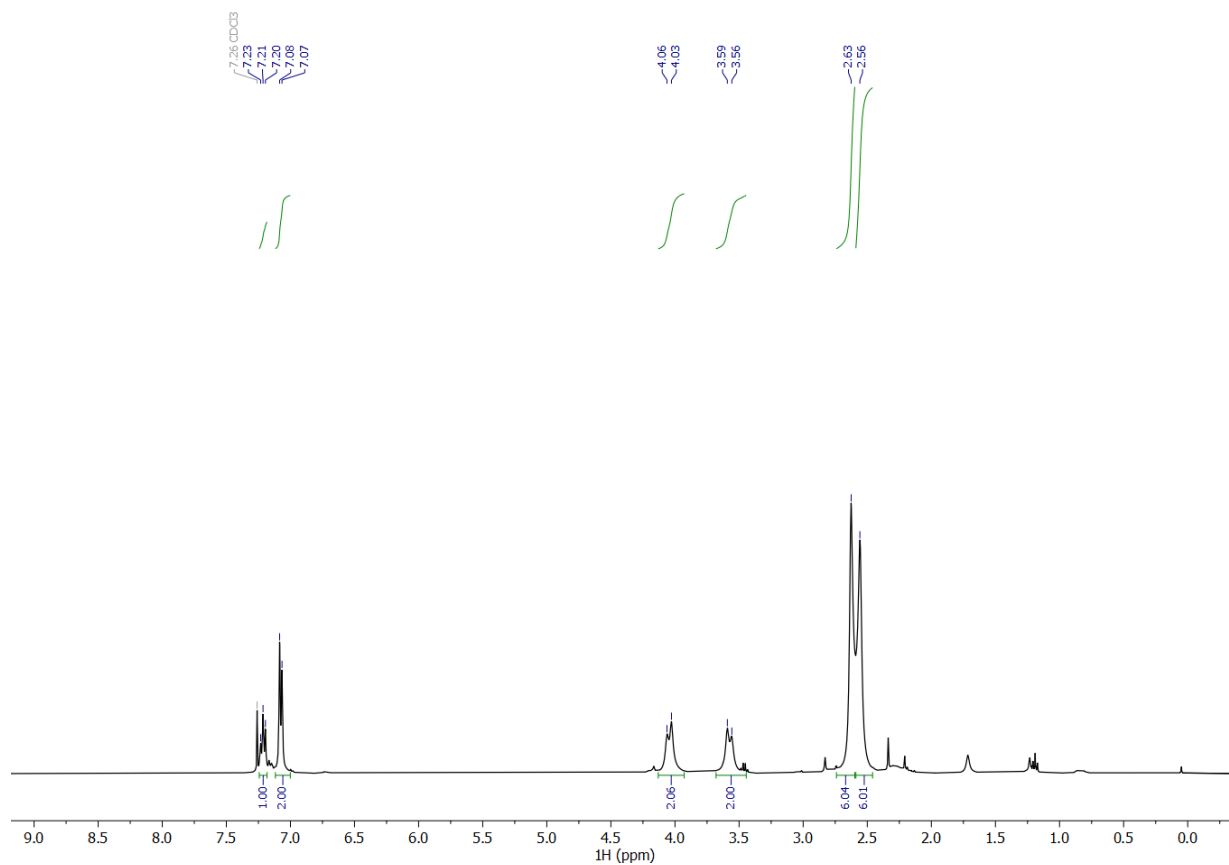

Figure S22.  $^1H$  NMR spectrum of **16** ( $CDCl_3$ , 400 MHz) at r.t.<sup>2</sup>

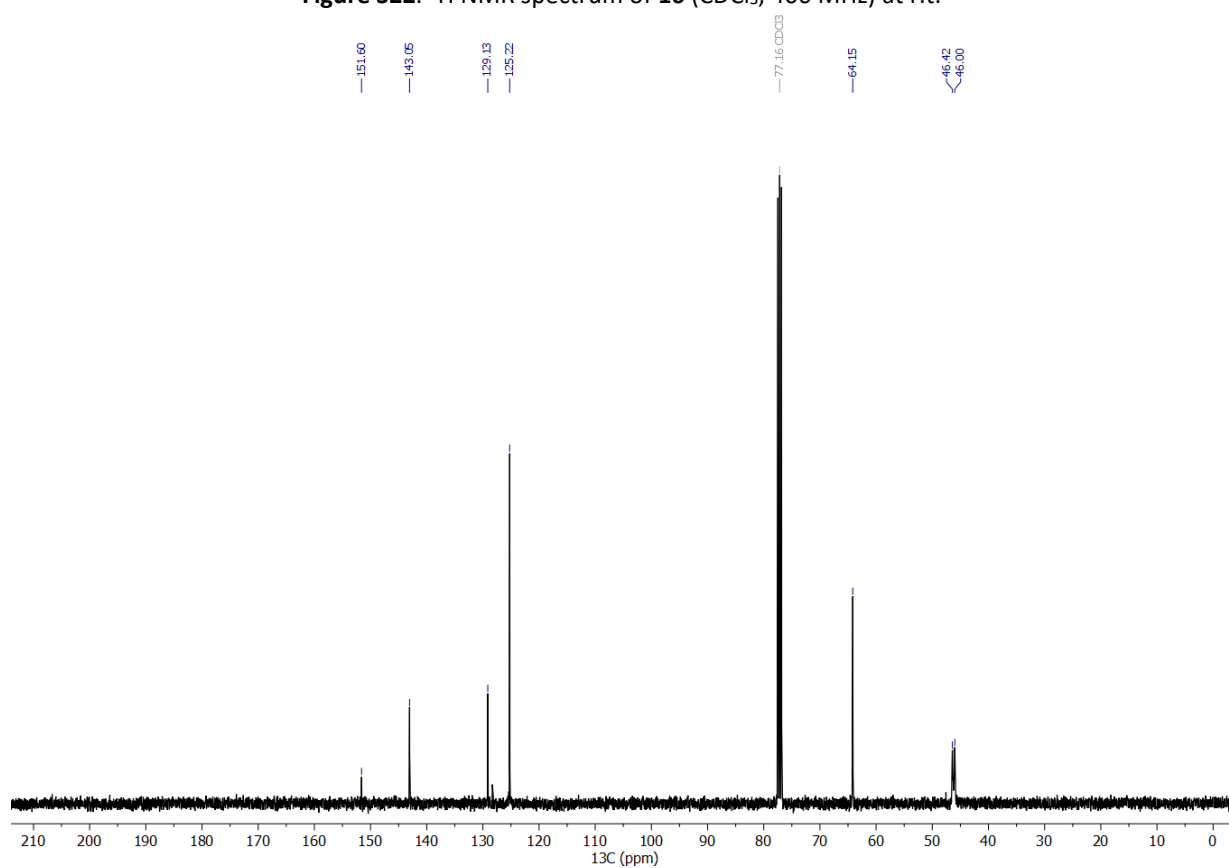

Figure S23.  $^{13}C\{^1H\}$  NMR spectrum of **16** ( $CDCl_3$ , 101 MHz) at r.t.<sup>2</sup>

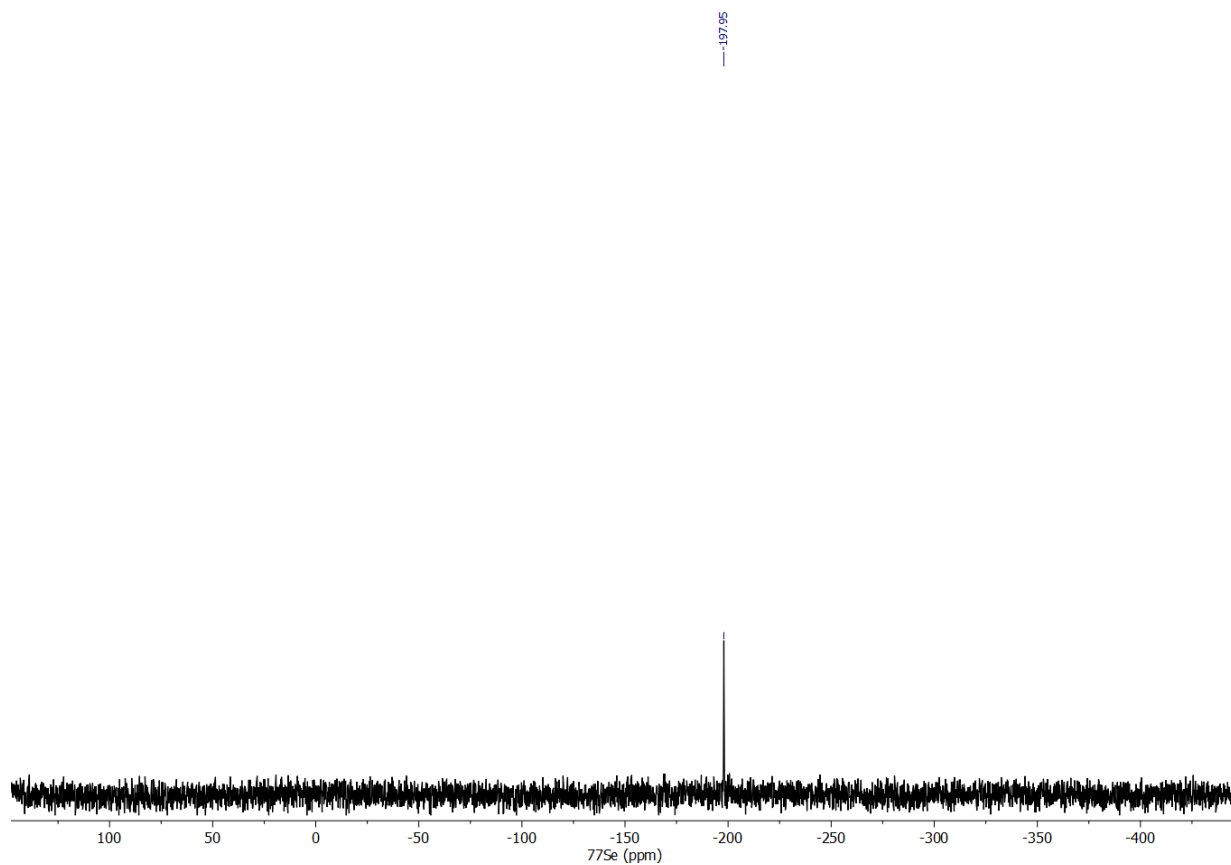

**Figure S24.**  $^{77}\text{Se}\{^1\text{H}\}$  NMR spectrum of **16** ( $\text{CDCl}_3$ , 76.33 MHz) at r.t.<sup>2</sup>

## Mass spectrometry data

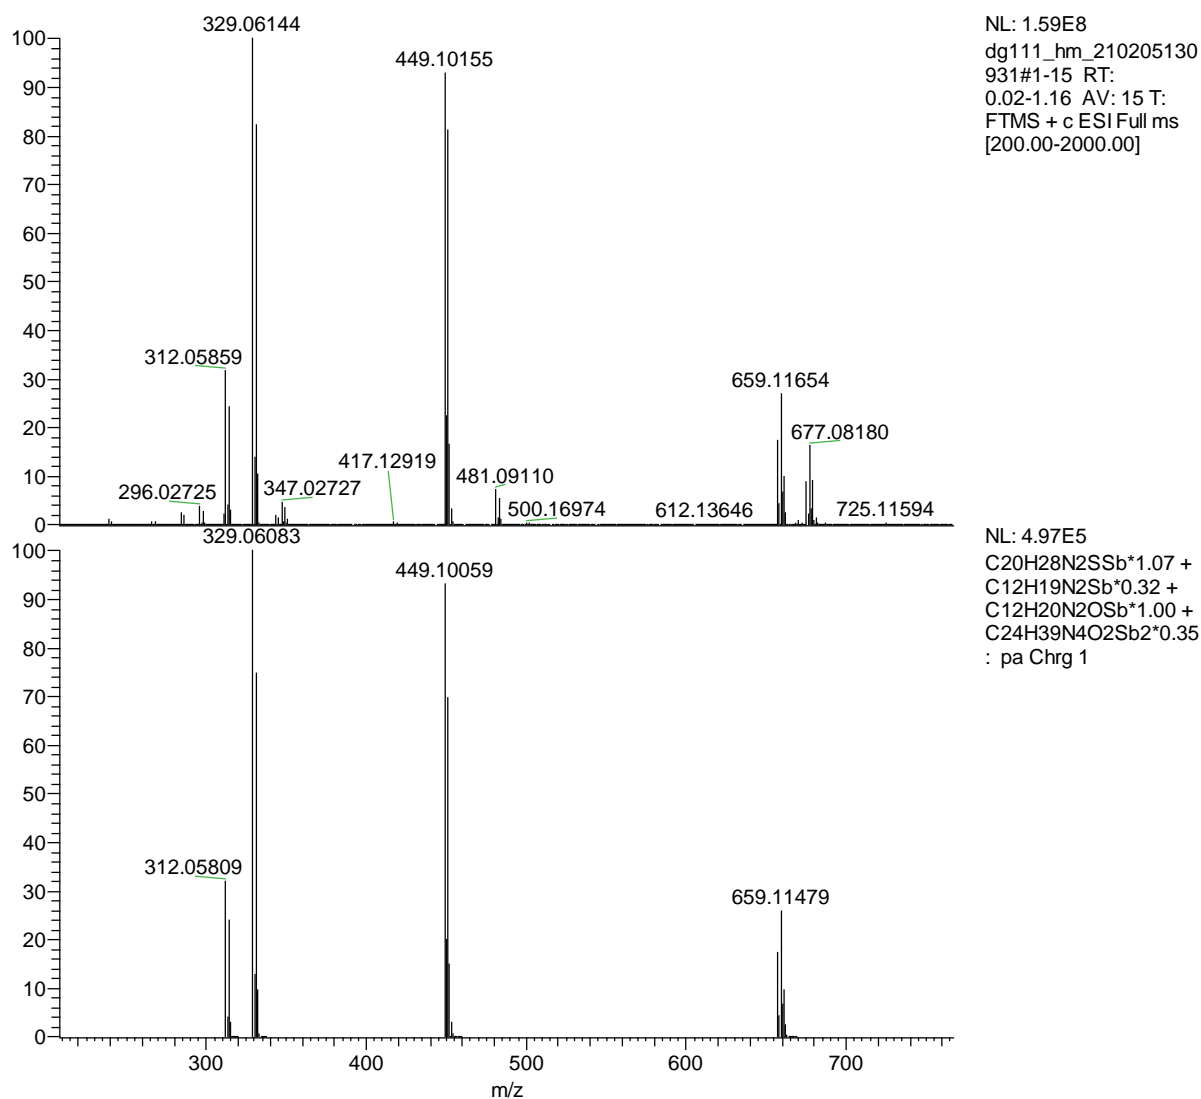

**Figure S25.** Experimental ESI+ mass spectrum (up) of compound **7** (solution in MeCN) and theoretical calculated isotopic pattern of selected ions (down).



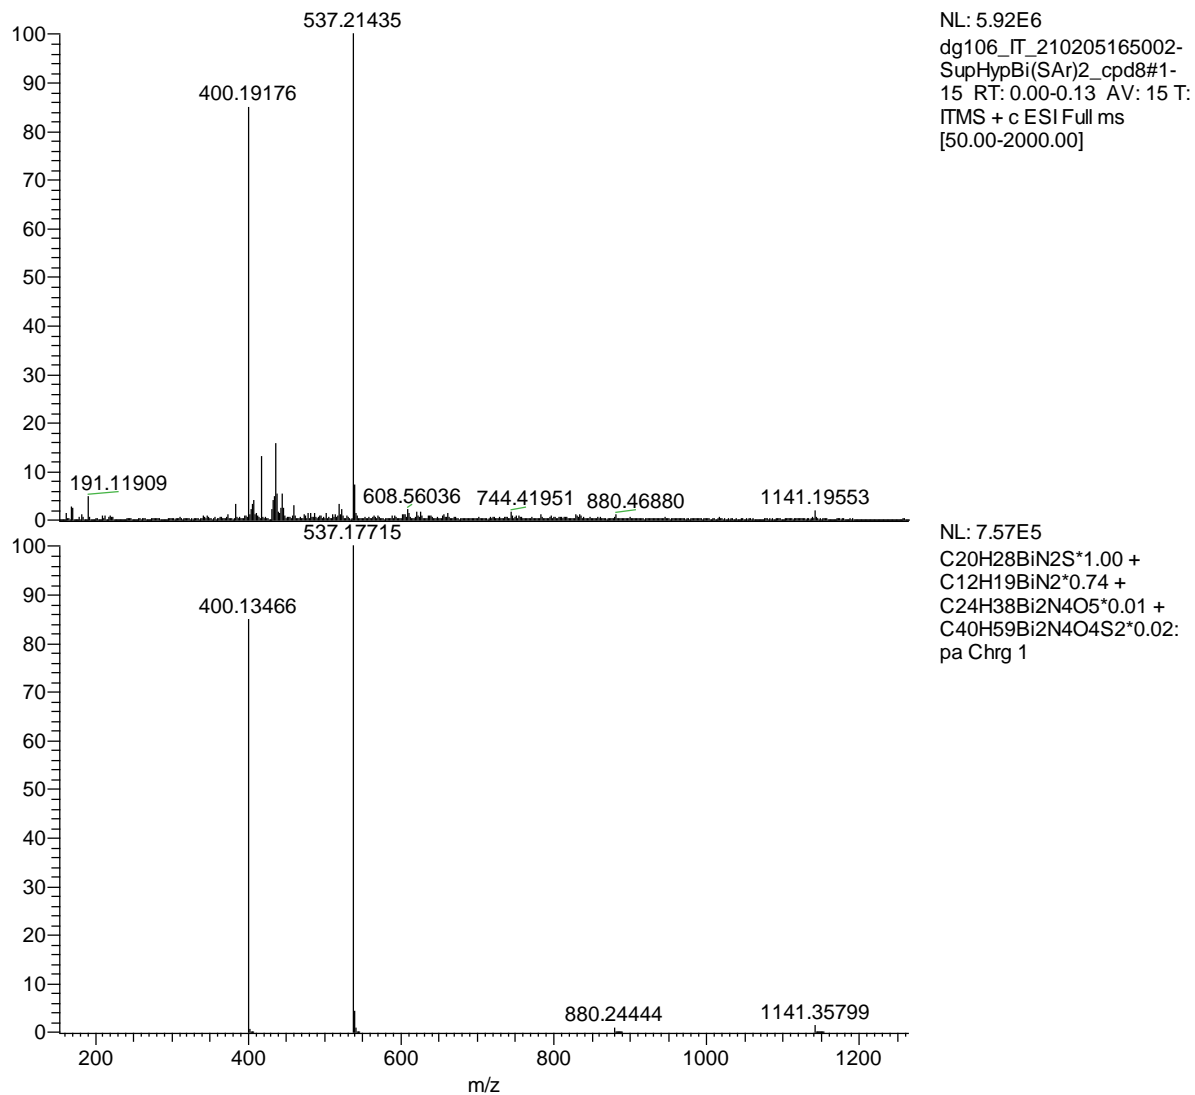

**Figure S26.** Experimental ESI+ mass spectrum (up) of compound **8** (solution in MeCN) and theoretical calculated isotopic pattern of selected ions (down).

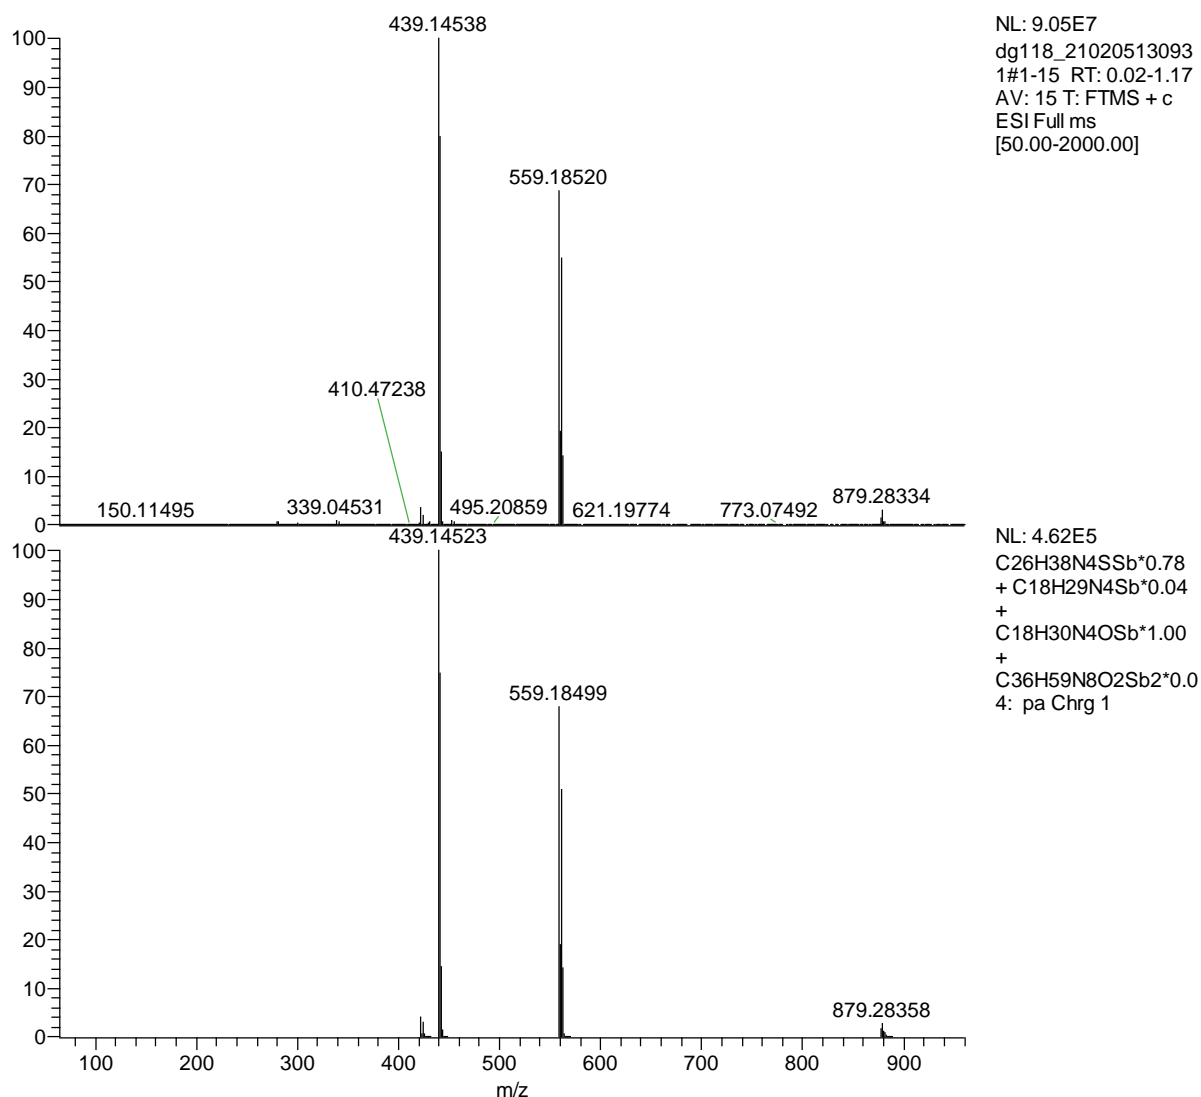

**Figure S27.** Experimental ESI+ mass spectrum (up) of compound **9** (solution in MeCN) and theoretical calculated isotopic pattern of selected ions (down).

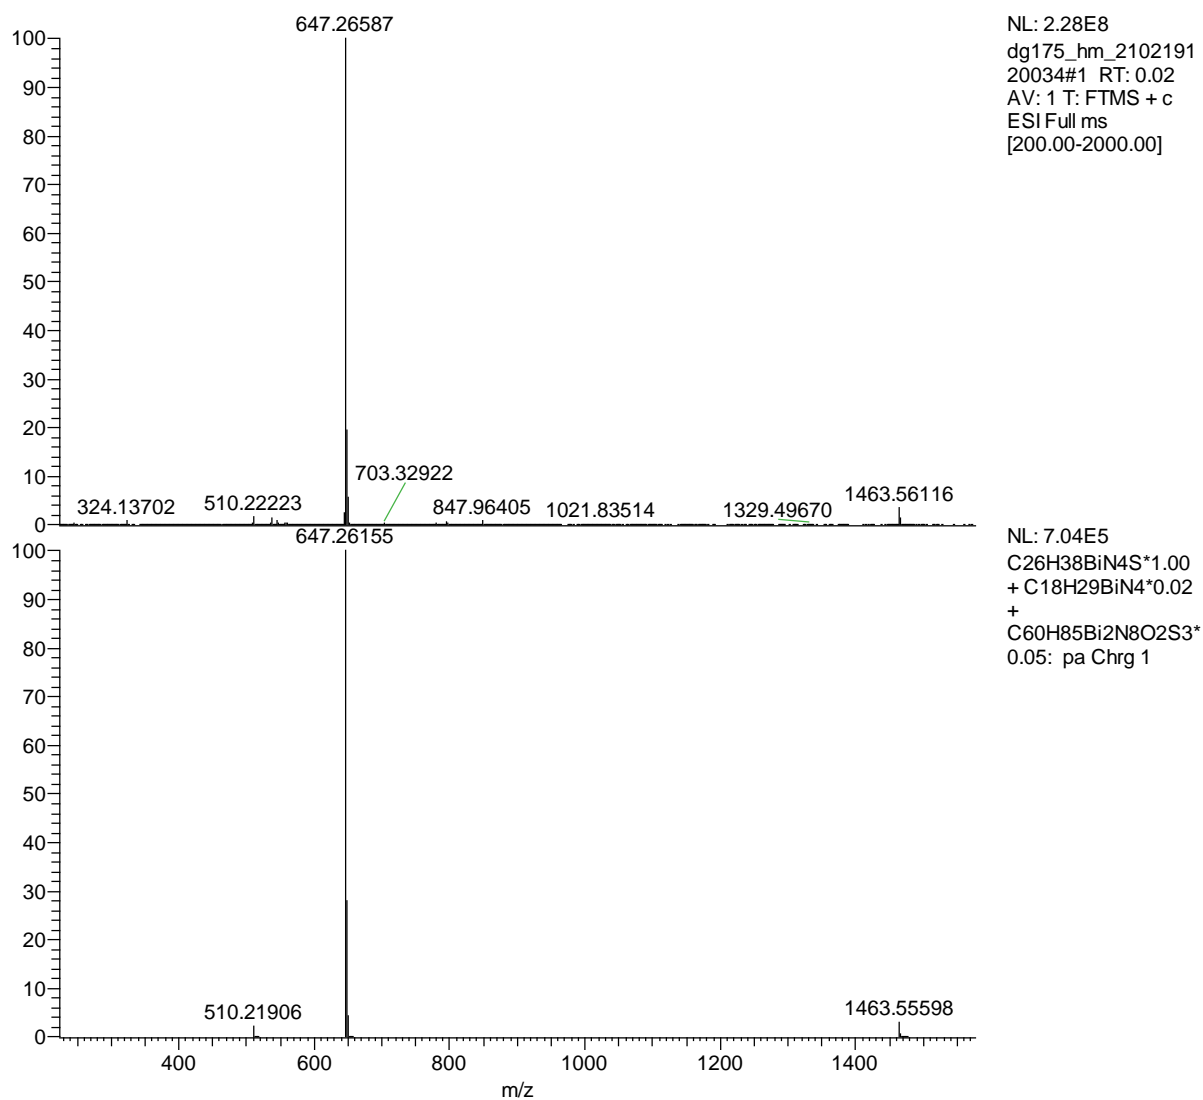

**Figure S28.** Experimental ESI+ mass spectrum (up) of compound **10** (solution in MeCN) and theoretical calculated isotopic pattern of selected ions (down).

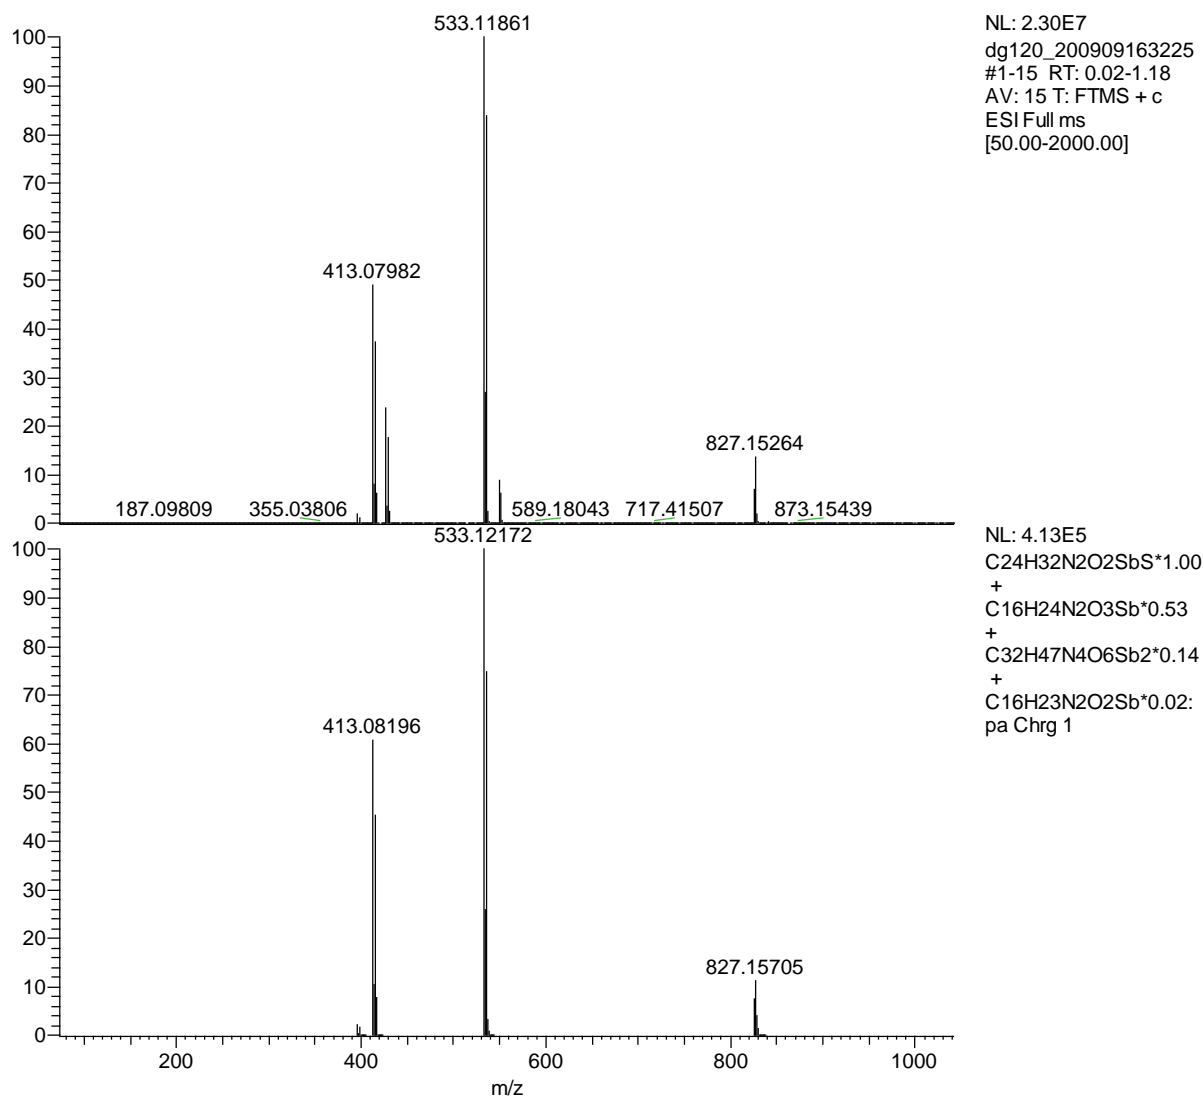

**Figure S29.** Experimental ESI+ mass spectrum (up) of compound **11** (solution in MeCN) and theoretical calculated isotopic pattern of selected ions (down).

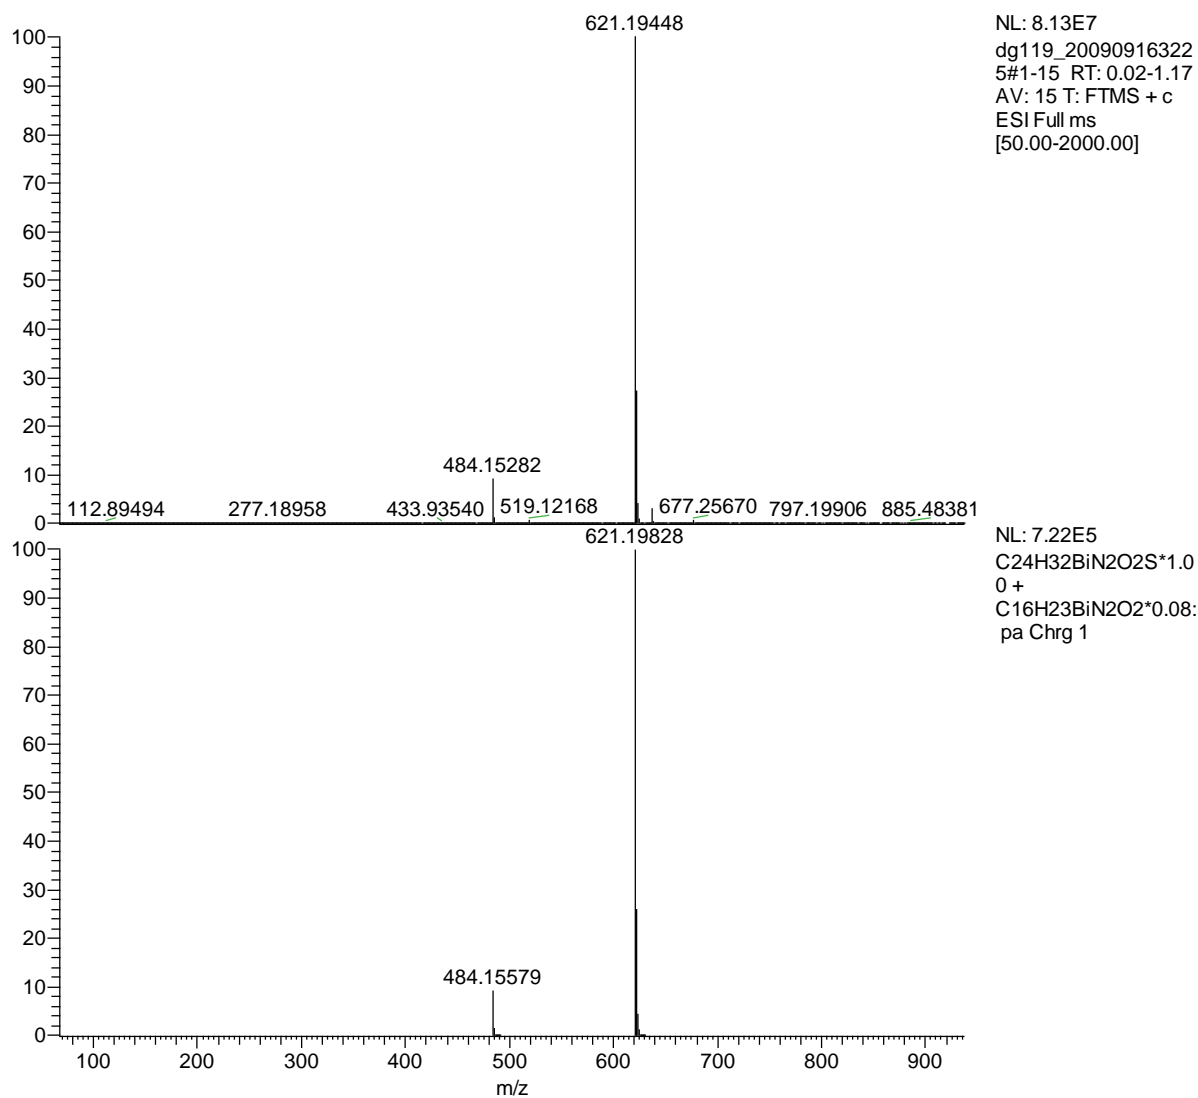

**Figure S30.** Experimental ESI+ mass spectrum (up) of compound **12** (solution in MeCN) and theoretical calculated isotopic pattern of selected ions (down).

## Crystallographic data

**Table S1.** Selected X-ray data collection.

| Compound                                            | 6·CHCl <sub>3</sub>                                                             | 7                                                                 | 8·CH <sub>3</sub> CN                                              | 11·THF                                                                          | 12                                                                             |
|-----------------------------------------------------|---------------------------------------------------------------------------------|-------------------------------------------------------------------|-------------------------------------------------------------------|---------------------------------------------------------------------------------|--------------------------------------------------------------------------------|
| Empirical formula                                   | C <sub>17</sub> H <sub>24</sub> BiCl <sub>5</sub> N <sub>2</sub> O <sub>2</sub> | C <sub>28</sub> H <sub>37</sub> N <sub>2</sub> S <sub>2</sub> Sb  | C <sub>30</sub> H <sub>40</sub> BiN <sub>3</sub> S <sub>2</sub>   | C <sub>36</sub> H <sub>49</sub> N <sub>2</sub> O <sub>3</sub> S <sub>2</sub> Sb | C <sub>32</sub> H <sub>41</sub> BiN <sub>2</sub> O <sub>2</sub> S <sub>2</sub> |
| Formula weight                                      | 674.61                                                                          | 587.46                                                            | 715.75                                                            | 743.64                                                                          | 758.77                                                                         |
| Crystal size /mm                                    | 0.220 x 0.175 x 0.130                                                           | 0.146 x 0.121 x 0.087                                             | 0.140 x 0.089 x 0.071                                             | 0.118 x 0.049 x 0.043                                                           | 0.160 x 0.106 x 0.046                                                          |
| Crystal habit                                       | colorless block                                                                 | colorless block                                                   | orange block                                                      | pale yellow block                                                               | pale yellow block                                                              |
| Wavelength (Å)                                      | 0.71073                                                                         | 0.71073                                                           |                                                                   | 0.71073                                                                         | 0.71073                                                                        |
| Temperature (K)                                     | 100(2)                                                                          | 100(2)                                                            | 100(2)                                                            | 100(2)                                                                          | 104.(2)                                                                        |
| Crystal system                                      | monoclinic                                                                      | triclinic                                                         | triclinic                                                         | triclinic                                                                       | monoclinic                                                                     |
| Space group                                         | P21/c                                                                           | P-1                                                               | P-1                                                               | P-1                                                                             | P21/c                                                                          |
| a (Å)                                               | 12.4920(4)                                                                      | 12.1970(4)                                                        | 11.7621(4)                                                        | 8.7258(2)                                                                       | 10.4719(4)                                                                     |
| b (Å)                                               | 17.3273(5)                                                                      | 14.4548(5)                                                        | 15.8832(5)                                                        | 12.5825(3)                                                                      | 19.9683(8)                                                                     |
| c (Å)                                               | 10.6153(3)                                                                      | 16.2120(5)                                                        | 16.5095(6)                                                        | 16.0673(4)                                                                      | 15.1511(5)                                                                     |
| α (°)                                               | 90                                                                              | 90.6200(10)                                                       | 102.5750(10)                                                      | 83.6510(10)                                                                     | 90                                                                             |
| β (°)                                               | 103.4660(10)                                                                    | 98.8230(10)                                                       | 91.6440(10)                                                       | 85.3440(10)                                                                     | 106.1090(10)                                                                   |
| γ (°)                                               | 90                                                                              | 102.0310(10)                                                      | 92.2030(10)                                                       | 88.7400(10)                                                                     | 90                                                                             |
| Volume (Å <sup>3</sup> )                            | 2234.54(12)                                                                     | 2759.69(16)                                                       | 3005.92(18)                                                       | 1747.31(7)                                                                      | 3043.8(2)                                                                      |
| Z                                                   | 4                                                                               | 4                                                                 | 4                                                                 | 2                                                                               | 4                                                                              |
| Density (calculated) (g cm <sup>-3</sup> )          | 2.005                                                                           | 1.414                                                             | 1.582                                                             | 1.413                                                                           | 1.656                                                                          |
| Absorption coefficient (mm <sup>-1</sup> )          | 8.504                                                                           | 1.169                                                             | 6.027                                                             | 0.946                                                                           | 5.961                                                                          |
| <i>F</i> (000)                                      | 1296                                                                            | 1208                                                              | 1424                                                              | 772                                                                             | 1512                                                                           |
| θ range for data collections (°)                    | 2.05–28.29                                                                      | 2.26–28.28                                                        | 2.01–28.28                                                        | 2.34–28.28                                                                      | 2.27–28.28                                                                     |
| T <sub>min</sub> / T <sub>max</sub>                 | 0.23 / 0.40                                                                     | 0.85 / 0.91                                                       | 0.49 / 0.67                                                       | 0.90 / 0.96                                                                     | 0.77 / 0.45                                                                    |
| Reflections collected                               | 41297                                                                           | 80596                                                             | 120500                                                            | 53453                                                                           | 44530                                                                          |
| Independent reflections, <i>R</i> <sub>int</sub>    | 5539, 0.0352                                                                    | 13686, 0.0251                                                     | 14917, 0.0270                                                     | 8687, 0.0253                                                                    | 7504, 0.0288                                                                   |
| Miller indices, h, k, l (min/max)                   | -16/16, -23/22, -14/14                                                          | -16/16, -19/19, -21/21                                            | -15/14, -21/21, -21/21                                            | -11/11, -16/16, -21/21                                                          | -13/13, -26/21, -20/20                                                         |
| Completeness to θ                                   | 99.9%                                                                           | 99.9%                                                             | 100%                                                              | 99.9%                                                                           | 99.5%                                                                          |
| Refinement method                                   | Full-matrix least-squares on F <sup>2</sup>                                     | Full-matrix least-squares on F <sup>2</sup>                       | Full-matrix least-squares on F <sup>2</sup>                       | Full-matrix least-squares on F <sup>2</sup>                                     | Full-matrix least-squares on F <sup>2</sup>                                    |
| Data / restraints / parameters                      | 5539 / 0 / 247                                                                  | 13686 / 0 / 614                                                   | 14917 / 0 / 670                                                   | 8687 / 326 / 456                                                                | 7504 / 0 / 359                                                                 |
| Goodness-of-fit on F <sup>2</sup>                   | 1.092                                                                           | 1.057                                                             | 1.024                                                             | 1.077                                                                           | 1.080                                                                          |
| Final <i>R</i> indices [ <i>I</i> > 2σ( <i>I</i> )] | <i>R</i> <sub>1</sub> = 0.0161<br><i>wR</i> <sub>2</sub> = 0.0332               | <i>R</i> <sub>1</sub> = 0.0162<br><i>wR</i> <sub>2</sub> = 0.0332 | <i>R</i> <sub>1</sub> = 0.0132<br><i>wR</i> <sub>2</sub> = 0.0263 | <i>R</i> <sub>1</sub> = 0.0172<br><i>wR</i> <sub>2</sub> = 0.0368               | <i>R</i> <sub>1</sub> = 0.0181<br><i>wR</i> <sub>2</sub> = 0.0326              |
| <i>R</i> indices (all data)                         | <i>R</i> <sub>1</sub> = 0.0179<br><i>wR</i> <sub>2</sub> = 0.0337               | <i>R</i> <sub>1</sub> = 0.0191<br><i>wR</i> <sub>2</sub> = 0.0345 | <i>R</i> <sub>1</sub> = 0.0158<br><i>wR</i> <sub>2</sub> = 0.0270 | <i>R</i> <sub>1</sub> = 0.0201<br><i>wR</i> <sub>2</sub> = 0.0379               | <i>R</i> <sub>1</sub> = 0.0238<br><i>wR</i> <sub>2</sub> = 0.0339              |
| Largest diff. peak and hole, eÅ <sup>-3</sup>       | 0.912, -0.846                                                                   | 0.338, -0.272                                                     | 0.785, -0.528                                                     | 0.380, -0.271                                                                   | 0.617, -0.613                                                                  |
| <b>CCDC No.</b>                                     | <b>2156665</b>                                                                  | <b>2152801</b>                                                    | <b>2152803</b>                                                    | <b>2152798</b>                                                                  | <b>2152797</b>                                                                 |

**Table S1 (cont).** Selected X-ray data collection.

| Compound                                           | 13                                                                            | 14                                                                            | 16                                                                                                  | 17                                                                             | 17·0.5I <sub>2</sub>                                                           |
|----------------------------------------------------|-------------------------------------------------------------------------------|-------------------------------------------------------------------------------|-----------------------------------------------------------------------------------------------------|--------------------------------------------------------------------------------|--------------------------------------------------------------------------------|
| Empirical formula                                  | C <sub>24</sub> H <sub>38</sub> N <sub>4</sub> O <sub>2</sub> Sb <sub>2</sub> | C <sub>24</sub> H <sub>38</sub> Bi <sub>2</sub> N <sub>4</sub> O <sub>2</sub> | C <sub>24</sub> H <sub>38</sub> N <sub>4</sub> S <sub>0.18</sub> Sb <sub>2</sub> Se <sub>1.82</sub> | C <sub>16</sub> H <sub>23</sub> BiI <sub>2</sub> N <sub>2</sub> O <sub>2</sub> | C <sub>16</sub> H <sub>23</sub> BiI <sub>3</sub> N <sub>2</sub> O <sub>2</sub> |
| Formula weight                                     | 658.08                                                                        | 832.54                                                                        | 775.57                                                                                              | 738.14                                                                         | 865.04                                                                         |
| Crystal size /mm                                   | 0.121 x 0.108 x 0.078                                                         | 0.104 x 0.084 x 0.032                                                         | 0.160 x 0.102 x 0.048                                                                               | 0.150 x 0.106 x 0.102                                                          | 0.089 x 0.066 x 0.057                                                          |
| Crystal habit                                      | colorless block                                                               | colorless block                                                               | pale yellow block                                                                                   | yellow block                                                                   | orange block                                                                   |
| Wavelength (Å)                                     | 0.71073                                                                       | 0.71073                                                                       | 0.71073                                                                                             | 0.71073                                                                        | 0.71073                                                                        |
| Temperature (K)                                    | 100.(2)                                                                       | 100.(2)                                                                       | 100.(2)                                                                                             | 100.(2)                                                                        | 295.(2)                                                                        |
| Crystal system                                     | monoclinic                                                                    | triclinic                                                                     | monoclinic                                                                                          | triclinic                                                                      | triclinic                                                                      |
| Space group                                        | P21/c                                                                         | P-1                                                                           | P21/n                                                                                               | P-1                                                                            | P-1                                                                            |
| a (Å)                                              | 6.5175(2)                                                                     | 6.4357(4)                                                                     | 6.5162(2)                                                                                           | 10.9293(4)                                                                     | 9.1472(2)                                                                      |
| b (Å)                                              | 17.3278(4)                                                                    | 9.7886(6)                                                                     | 11.3605(5)                                                                                          | 13.7803(6)                                                                     | 9.8243(2)                                                                      |
| c (Å)                                              | 12.0941(3)                                                                    | 11.9131(7)                                                                    | 18.7822(6)                                                                                          | 13.8198(5)                                                                     | 13.1662(3)                                                                     |
| α (°)                                              | 90                                                                            | 67.762(2)                                                                     | 90                                                                                                  | 100.7360(10)                                                                   | 90.5660(10)                                                                    |
| β (°)                                              | 100.3140(10)                                                                  | 89.344(2)                                                                     | 98.7430(10)                                                                                         | 91.0790(10)                                                                    | 94.0610(10)                                                                    |
| γ (°)                                              | 90                                                                            | 78.893(2)                                                                     | 90                                                                                                  | 106.0340(10)                                                                   | 109.3520(10)                                                                   |
| Volume (Å <sup>3</sup> )                           | 1343.76(6)                                                                    | 680.09(7)                                                                     | 1374.24(9)                                                                                          | 1959.95(13)                                                                    | 1112.83(4)                                                                     |
| Z                                                  | 2                                                                             | 1                                                                             | 2                                                                                                   | 4                                                                              | 2                                                                              |
| Density (calculated) (g cm <sup>-3</sup> )         | 1.626                                                                         | 2.033                                                                         | 1.874                                                                                               | 2.502                                                                          | 2.582                                                                          |
| Absorption coefficient (mm <sup>-1</sup> )         | 2.037                                                                         | 12.946                                                                        | 4.409                                                                                               | 12.156                                                                         | 12.094                                                                         |
| <i>F</i> (000)                                     | 656                                                                           | 392                                                                           | 753.5                                                                                               | 1352                                                                           | 782                                                                            |
| θ range for data collections (°)                   | 2.35 - 28.28                                                                  | 2.33 - 28.28                                                                  | 2.10-28.28                                                                                          | 1.94-25.00                                                                     | 2.20-28.28                                                                     |
| T <sub>min</sub> / T <sub>max</sub>                | 0.79 / 0.86                                                                   | 0.40 / 0.68                                                                   | 0.62 / 0.82                                                                                         | 0.18 / 0.37                                                                    | 0.55 / 0.41                                                                    |
| Reflections collected                              | 22683                                                                         | 38695                                                                         | 51760                                                                                               | 51306                                                                          | 39183                                                                          |
| Independent reflections, <i>R</i> <sub>int</sub>   | 3333, 0.0236                                                                  | 3371, 0.0272                                                                  | 3406, 0.0250                                                                                        | 6891, 0.0352                                                                   | 5515, 0.0239                                                                   |
| Miller indices, h, k, l (min/max)                  | -8/8, -22/23, -16/16                                                          | -8/8, -13/13, -15/15                                                          | -8/8, -15/15, -25/23                                                                                | -12/12, -16/16, -16/15                                                         | -11/12, -13/13, -17/17                                                         |
| Completeness to θ                                  | 99.9%                                                                         | 99.9%                                                                         | 99.9%                                                                                               | 100%                                                                           | 99.9%                                                                          |
| Refinement method                                  | Full-matrix least-squares on F <sup>2</sup>                                   | Full-matrix least-squares on F <sup>2</sup>                                   | Full-matrix least-squares on F <sup>2</sup>                                                         | Full-matrix least-squares on F <sup>2</sup>                                    | Full-matrix least-squares on F <sup>2</sup>                                    |
| Data / restraints / parameters                     | 3333 / 0 / 152                                                                | 3371 / 0 / 152                                                                | 3406 / 0 / 152                                                                                      | 6891 / 0 / 418                                                                 | 5515 / 0 / 221                                                                 |
| Goodness-of-fit on F <sup>2</sup>                  | 1.068                                                                         | 1.086                                                                         | 1.333                                                                                               | 1.119                                                                          | 1.066                                                                          |
| Final <i>R</i> indices [ <i>I</i> >2σ( <i>I</i> )] | <i>R</i> <sub>1</sub> = 0.0123<br><i>wR</i> <sub>2</sub> = 0.0262             | <i>R</i> <sub>1</sub> = 0.0090<br><i>wR</i> <sub>2</sub> = 0.0201             | <i>R</i> <sub>1</sub> = 0.0310<br><i>wR</i> <sub>2</sub> = 0.0713                                   | <i>R</i> <sub>1</sub> = 0.0192<br><i>wR</i> <sub>2</sub> = 0.0474              | <i>R</i> <sub>1</sub> = 0.0269<br><i>wR</i> <sub>2</sub> = 0.0676              |
| <i>R</i> indices (all data)                        | <i>R</i> <sub>1</sub> = 0.0137<br><i>wR</i> <sub>2</sub> = 0.0268             | <i>R</i> <sub>1</sub> = 0.0094<br><i>wR</i> <sub>2</sub> = 0.0203             | <i>R</i> <sub>1</sub> = 0.0312<br><i>wR</i> <sub>2</sub> = 0.0713                                   | <i>R</i> <sub>1</sub> = 0.0193<br><i>wR</i> <sub>2</sub> = 0.0475              | <i>R</i> <sub>1</sub> = 0.0287<br><i>wR</i> <sub>2</sub> = 0.0686              |
| Largest diff. peak and hole, eÅ <sup>-3</sup>      | 0.315, -0.247                                                                 | 0.297, -0.746                                                                 | 1.644, -0.887                                                                                       | 1.082, -1.928                                                                  | 1.096, -1.557                                                                  |
| CCDC No.                                           | 2152800                                                                       | 2152796                                                                       | 2152802                                                                                             | 2156666                                                                        | 2152799                                                                        |

**Table S2.** Comparison of experimental metrical parameters (selected bond distances Å and angles °) in compounds **6**·CHCl<sub>3</sub>, **8**·CH<sub>3</sub>CN, **12** and **14**.

| <b>6</b> ·CHCl <sub>3</sub> |            | <b>Molecule</b>               | <b>Molecule</b>               | <b>12</b>  | <b>14</b>         |            |
|-----------------------------|------------|-------------------------------|-------------------------------|------------|-------------------|------------|
|                             |            | <b>8a</b> ·CH <sub>3</sub> CN | <b>8b</b> ·CH <sub>3</sub> CN |            |                   |            |
| Bi(1)–C(1)                  | 2.191(2)   | Bi(1)–C(1)                    | 2.1999(15)                    | 2.259(2)   | Bi(1)–C(1)        | 2.2579(16) |
| Bi(1)–Cl(1)                 | 2.6638(6)  | Bi(1)–S(1)                    | 2.8132(4)                     | 2.6253(6)  | Bi(1)–O(1)        | 2.1319(13) |
| Bi(1)–Cl(2)                 | 2.7471(6)  | Bi(1)–S(2)                    | 2.7681(5)                     | 2.6373(6)  | Bi(1)–O(1a)       | 2.1139(12) |
| Bi(1)–N(1)                  | 2.5609(18) | Bi(1)–N(1)                    | 2.5293(13)                    | 2.9901(18) | Bi(1)–N(1)        | 2.8443(14) |
| Bi(1)–N(2)                  | 2.5648(18) | Bi(1)–N(2)                    | 2.5820(13)                    | 2.8044(17) | Bi(1)–N(2)        | 2.7569(16) |
| C(1)–Bi(1)–Cl(1)            | 86.65(5)   | Bi(2)–C(29)                   |                               | 2.2054(17) | C(1)–Bi(1)–O(1)   | 95.35(5)   |
| C(1)–Bi(1)–Cl(2)            | 87.35(5)   | Bi(2)–S(3)                    |                               | 2.8096(5)  | C(1)–Bi(1)–O(1a)  | 94.86(5)   |
| C(1)–Bi(1)–N(1)             | 72.54(7)   | Bi(2)–S(4)                    |                               | 2.7733(5)  | C(1)–Bi(1)–N(1)   | 67.84(5)   |
| C(1)–Bi(1)–N(2)             | 73.18(7)   | Bi(2)–N(3)                    |                               | 2.5974(14) | C(1)–Bi(1)–N(2)   | 69.05(5)   |
|                             |            | Bi(2)–N(4)                    |                               | 2.5288(14) |                   |            |
| Cl(1)–Bi(1)–Cl(2)           | 173.80(2)  |                               |                               |            | O(1)–Bi(1)–O(1a)  | 79.73(5)   |
| N(1)–Bi(1)–N(2)             | 145.68(6)  | C(1)–Bi(1)–S(1)               | 83.51(4)                      | 94.57(6)   | N(1)–Bi(1)–N(2)   | 121.19(4)  |
| Cl(1)–Bi(1)–N(1)            | 83.67(4)   | C(1)–Bi(1)–S(2)               | 88.84(4)                      | 95.97(5)   | O(1)–Bi(1)–N(1)   | 72.96(4)   |
| N(1)–Bi(1)–Cl(2)            | 96.01(4)   | C(1)–Bi(1)–N(1)               | 72.76(5)                      | 65.89(6)   | N(1)–Bi(1)–O(1a)  | 145.60(4)  |
| Cl(2)–Bi(1)–N(2)            | 80.74(4)   | C(1)–Bi(1)–N(2)               | 71.71(5)                      | 68.34(6)   | O(1a)–Bi(1)–N(2)  | 74.84(4)   |
| N(2)–Bi(1)–Cl(1)            | 96.01(4)   | S(1)–Bi(1)–S(2)               | 169.36(2)                     | 82.10(2)   | N(2)–Bi(1)–O(1)   | 148.55(4)  |
|                             |            | N(1)–Bi(1)–N(2)               | 144.38(4)                     | 110.94(5)  | Bi(1)–O(1)–Bi(1a) | 100.27(5)  |
|                             |            | S(1)–Bi(1)–N(1)               | 97.21(3)                      | 153.88(4)  |                   |            |
|                             |            | N(1)–Bi(1)–S(2)               | 87.52(3)                      | 82.92(3)   |                   |            |
|                             |            | S(2)–Bi(1)–N(2)               | 89.33(3)                      | 150.14(4)  |                   |            |
|                             |            | N(2)–Bi(1)–S(1)               | 81.27(3)                      | 74.39(4)   |                   |            |
|                             |            | C(29)–Bi(2)–S(3)              |                               | 83.85(4)   |                   |            |
|                             |            | C(29)–Bi(2)–S(4)              |                               | 84.59(4)   |                   |            |
|                             |            | C(29)–Bi(2)–N(3)              |                               | 71.38(5)   |                   |            |
|                             |            | C(29)–Bi(2)–N(4)              |                               | 72.76(5)   |                   |            |
|                             |            | S(3)–Bi(2)–S(4)               |                               | 168.29(2)  |                   |            |
|                             |            | N(3)–Bi(2)–N(4)               |                               | 144.09(5)  |                   |            |
|                             |            | S(3)–Bi(2)–N(3)               |                               | 88.43(3)   |                   |            |
|                             |            | N(3)–Bi(2)–S(4)               |                               | 86.07(3)   |                   |            |
|                             |            | S(4)–Bi(2)–N(4)               |                               | 92.50(3)   |                   |            |
|                             |            | N(4)–Bi(2)–S(3)               |                               | 85.90(3)   |                   |            |



**Table S3.** Comparison of experimental metrical parameters (selected bond distances Å and angles °) in compounds **7**, **11**·THF, **13** and **16**.

|                  | Molecule<br><b>7a</b> | Molecule<br><b>7b</b> | <b>11</b> ·THF | <b>13</b> *       | <b>16</b> ** |                    |           |
|------------------|-----------------------|-----------------------|----------------|-------------------|--------------|--------------------|-----------|
| Sb(1)–C(1)       | 2.1799(12)            |                       | 2.1743(12)     | Sb(1)–C(1)        | 2.1708(11)   | Sb(1)–C(1)         | 2.183(3)  |
| Sb(1)–S(1)       | 2.5163(4)             |                       | 2.4905(4)      | Sb(1)–O(1)        | 2.0081(9)    | Sb(1)–Se(1)        | 2.6103(5) |
| Sb(1)–S(2)       | 2.4382(4)             |                       | 2.4567(3)      | Sb(1)–O(1a)       | 2.0209(9)    | Sb(1)–Se(1a)       | 2.6356(5) |
| Sb(1)–N(1)       | 2.7373(10)            |                       | 2.8426(10)     | Sb(1)–N(1)        | 2.6335(10)   | Sb(1)–N(1)         | 2.772(3)  |
|                  |                       |                       |                | Sb(1)–N(2)        | 2.7975(11)   | Sb(1)–N(2)         | 2.803(3)  |
| Sb(2)–C(29)      |                       | 2.1817(13)            |                |                   |              |                    |           |
| Sb(2)–S(3)       |                       | 2.5186(4)             |                | C(1)–Sb(1)–O(1)   | 95.73(4)     | C(1)–Sb(1)–Se(1)   | 99.79(10) |
| Sb(2)–S(4)       |                       | 2.4406(5)             |                | C(1)–Sb(1)–O(1a)  | 95.08(4)     | C(1)–Sb(1)–Se(1a)  | 97.79(9)  |
| Sb(2)–N(3)       |                       | 2.6660(12)            |                | C(1)–Sb(1)–N(1)   | 70.68(4)     | C(1)–Sb(1)–N(1)    | 69.34(11) |
|                  |                       |                       |                | C(1)–Sb(1)–N(2)   | 68.91(4)     | C(1)–Sb(1)–N(2)    | 68.63(12) |
| C(1)–Sb(1)–S(1)  | 100.63(3)             |                       | 98.97(3)       |                   |              |                    |           |
| C(1)–Sb(1)–S(2)  | 90.08(3)              |                       | 95.34(3)       | O(1)–Sb(1)–O(1a)  | 79.64(4)     | Se(1)–Sb(1)–Se(1a) | 85.73(1)  |
| C(1)–Sb(1)–N(1)  | 72.05(4)              |                       | 70.91(4)       | N(1)–Sb(1)–N(2)   | 122.03(3)    | N(1)–Sb(1)–N(2)    | 115.41(9) |
| S(1)–Sb(1)–S(2)  | 98.60(1)              |                       | 93.42(1)       | O(1)–Sb(1)–N(1)   | 75.11(3)     | Se(1)–Sb(1)–N(1)   | 76.61(7)  |
| S(1)–Sb(1)–N(1)  | 165.39(2)             |                       | 167.68(2)      | N(1)–Sb(1)–O(1a)  | 149.30(3)    | N(1)–Sb(1)–Se(1a)  | 155.60(7) |
| N(1)–Sb(1)–S(2)  | 94.11(2)              |                       | 94.51(2)       | O(1a)–Sb(1)–N(2)  | 73.75(3)     | Se(1a)–Sb(1)–N(2)  | 76.06(7)  |
|                  |                       |                       |                | N(2)–Sb(1)–O(1)   | 147.53(4)    | N(2)–Sb(1)–Se(1)   | 156.44(7) |
| C(29)–Sb(2)–S(3) |                       | 99.72(3)              |                | Sb(1)–O(1)–Sb(1a) | 100.36(4)    | Sb(1)–Se(1)–Sb(1a) | 94.27(2)  |
| C(29)–Sb(2)–S(4) |                       | 90.76(3)              |                |                   |              |                    |           |
| C(29)–Sb(2)–N(3) |                       | 72.13(4)              |                |                   |              |                    |           |
| S(3)–Sb(2)–S(4)  |                       | 99.47(1)              |                |                   |              |                    |           |
| S(3)–Sb(2)–N(3)  |                       | 167.28(3)             |                |                   |              |                    |           |
| N(3)–Sb(2)–S(4)  |                       | 90.53(3)              |                |                   |              |                    |           |

\* The solid state structure of **13** was previously reported by Dostál *et al.*<sup>3</sup>

\*\* A substitutional Se/S disorder was identified in the crystal of **16**, with site occupancies of 91:9.

**Table S4.** Comparison of experimental metrical parameters (selected bond distances Å and angles °) in compounds **17** and **17·0.5I<sub>2</sub>**.

|                  | Molecule<br><b>17a</b> | Molecule<br><b>17b</b> | <b>17·0.5I<sub>2</sub></b> |
|------------------|------------------------|------------------------|----------------------------|
| Bi(1)–C(1)       | 2.209(4)               |                        | 2.205(5)                   |
| Bi(1)–I(1)       | 3.1286(4)              |                        | 3.0280(4)                  |
| Bi(1)–I(2)       | 2.9999(4)              |                        | 3.1151(5)                  |
| Bi(1)–N(1)       | 2.584(4)               |                        | 2.596(5)                   |
| Bi(1)–N(2)       | 2.628(4)               |                        | 2.608(5)                   |
| I(3)–I(3a)       |                        |                        | 2.7756(9)                  |
| Bi(2)–C(17)      |                        | 2.200(4)               |                            |
| Bi(2)–I(3)       |                        | 3.0464(5)              |                            |
| Bi(2)–I(4)       |                        | 3.0868(4)              |                            |
| Bi(2)–N(3)       |                        | 2.573(4)               |                            |
| Bi(2)–N(4)       |                        | 2.602(5)               |                            |
| C(1)–Bi(1)–I(1)  | 89.33(11)              |                        | 91.88(17)                  |
| C(1)–Bi(1)–I(2)  | 92.64(11)              |                        | 88.11(17)                  |
| C(1)–Bi(1)–N(1)  | 72.11(15)              |                        | 72.62(19)                  |
| C(1)–Bi(1)–N(2)  | 71.48(15)              |                        | 72.56(18)                  |
| I(1)–Bi(1)–I(2)  | 177.89(1)              |                        | 178.87(1)                  |
| N(1)–Bi(1)–N(2)  | 143.43(13)             |                        | 145.14(15)                 |
| I(1)–Bi(1)–N(1)  | 97.39(9)               |                        | 85.36(11)                  |
| N(1)–Bi(1)–I(2)  | 82.50(9)               |                        | 95.72(11)                  |
| I(2)–Bi(1)–N(2)  | 95.82(9)               |                        | 81.79(11)                  |
| N(2)–Bi(1)–I(1)  | 85.53(9)               |                        | 97.13(11)                  |
| C(17)–Bi(2)–I(3) |                        | 89.99(11)              |                            |
| C(17)–Bi(2)–I(4) |                        | 93.49(11)              |                            |
| C(17)–Bi(2)–N(3) |                        | 72.02(15)              |                            |
| C(17)–Bi(2)–N(4) |                        | 72.41(15)              |                            |
| I(3)–Bi(2)–I(4)  |                        | 176.14(1)              |                            |
| N(3)–Bi(2)–N(4)  |                        | 144.42(13)             |                            |
| I(3)–Bi(2)–N(3)  |                        | 84.89(9)               |                            |
| N(3)–Bi(2)–I(4)  |                        | 94.58(9)               |                            |
| I(4)–Bi(2)–N(4)  |                        | 86.54(9)               |                            |
| N(4)–Bi(2)–I(3)  |                        | 96.13(9)               |                            |

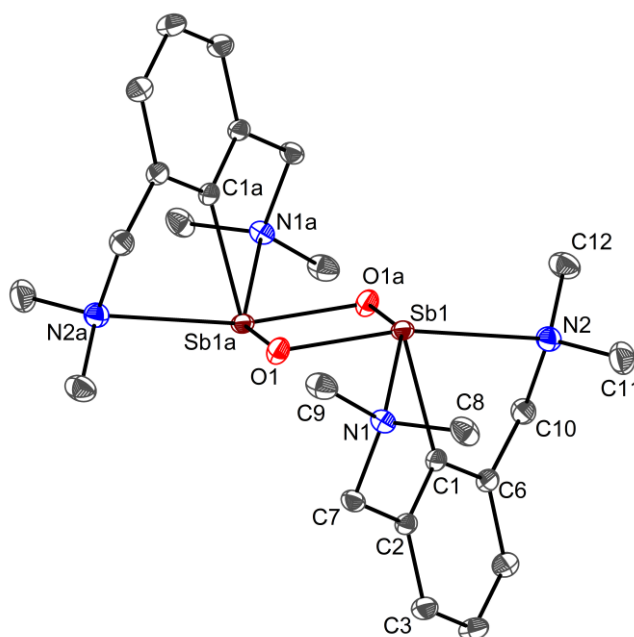

**Figure S31.** ORTEP representation of the isomer *cyclo-anti-(pRN<sub>1</sub>,pSN<sub>2</sub>)(pSN<sub>1a</sub>,pRN<sub>2a</sub>)-13* with ellipsoids drawn at the 50% probability level. Hydrogen atoms were omitted for clarity [symmetry equivalent atoms ( $1-x$ ,  $1-y$ ,  $1-z$ ) are given by "a"]. Selected bond lengths (Å) and angles (°): Sb1–C1 2.1708(11); Sb1–O1 2.0081(9); Sb1–O1a 2.0209(9); Sb1–N1 2.6335(11); Sb1–N2 2.7975(11); N1–Sb1–N2 122.03(3); O1a–Sb1–N1 149.30(3); O1–Sb1–N2 147.53(4); O1–Sb1–O1a 79.64(4); Sb1–O1–Sb1a 100.36(3).

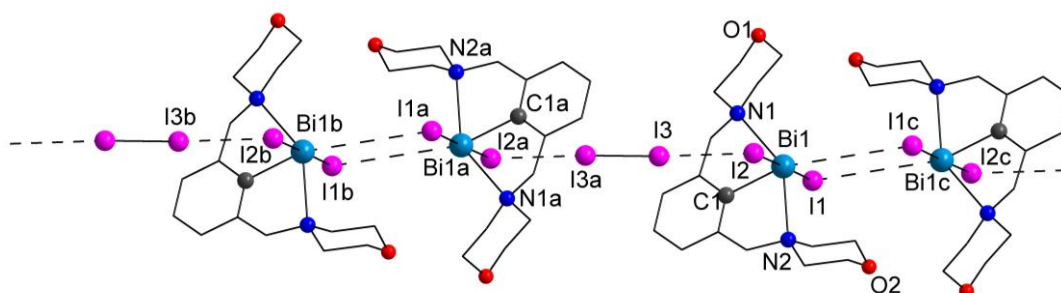

**Figure S32.** 1D-chain polymer of the type  $(17 \cdot 0.5I_2)_n$  based on weak intermolecular Bi...I interactions. The hydrogen atoms were omitted for clarity [symmetry equivalent atoms ( $1-x$ ,  $1-y$ ,  $1-z$ ), ( $-1+x$ ,  $1+y$ ,  $1+z$ ) and ( $1-x$ ,  $1-y$ ,  $2-z$ ) are given by "a", "b" and "c"]. Selected bond lengths (Å) and angles (°): Bi1...I1c 4.4133(5); I1–Bi1...I1c 71.80(1); Bi1–I1...Bi1c 108.20(1).

## References

1. L. Dostál, R. Jambor, A. Růžička, R. Jirásko, V. Lochař, L. Beneš and F. de Proft, *Inorg. Chem.*, 2009, **48**, 10495-10497.
2. L. Dostál, R. Jambor, A. Růžička, A. Lyčka, J. Brus and F. de Proft, *Organometallics*, 2008, **27**, 6059-6062.
3. L. Dostál, R. Jambor, A. Růžička, M. Erben, R. Jirásko, E. Černošková and J. Holeček, *Organometallics*, 2009, **28**, 2633-2636.
